# Supplementary material
Source: PubMed Central journal article supplement (PMC11648602)

Localization of ADAL process

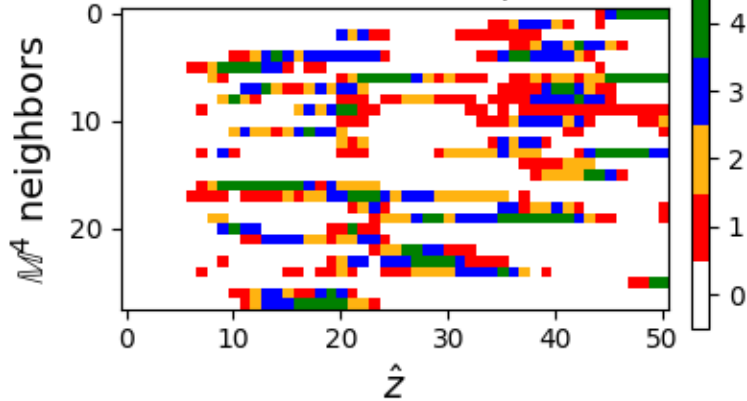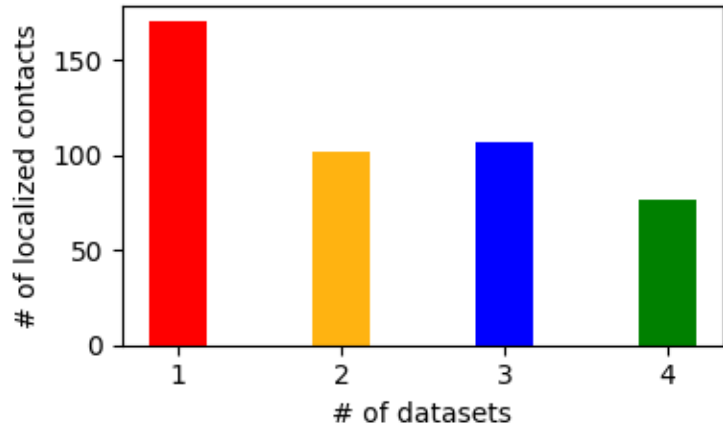

Localization of ADEL process

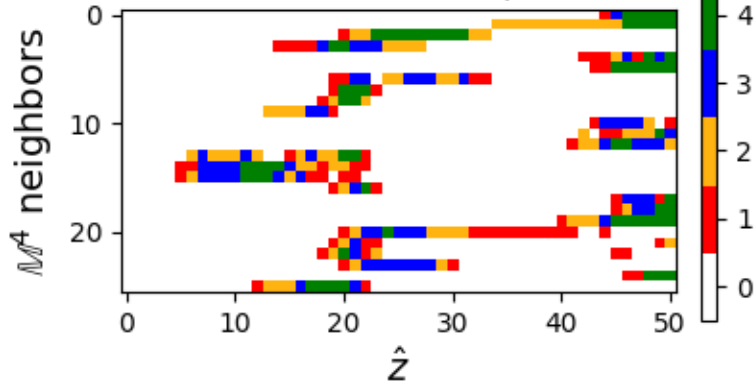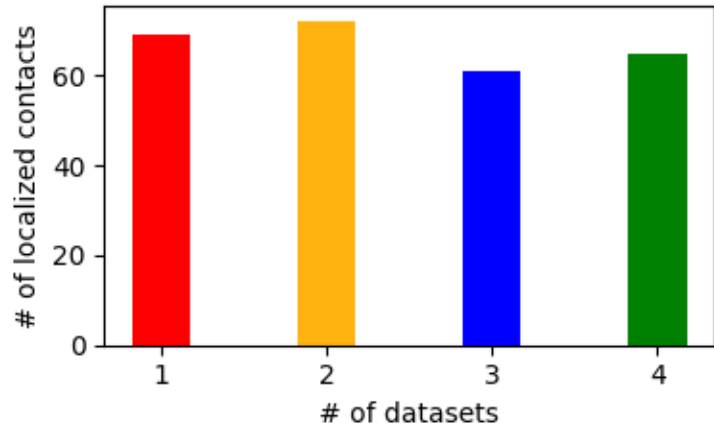

$\mathcal{M}^A$  neighbors

Localization of ADFL process

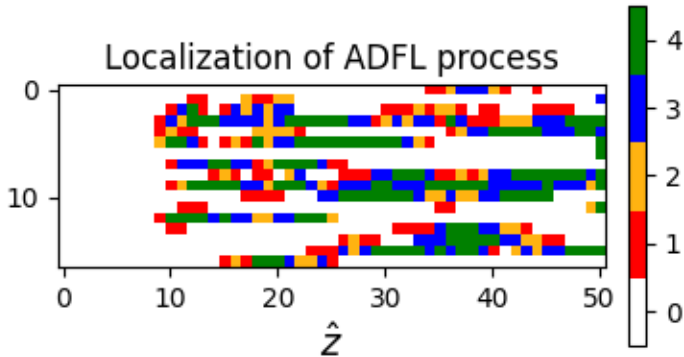

# of localized contacts

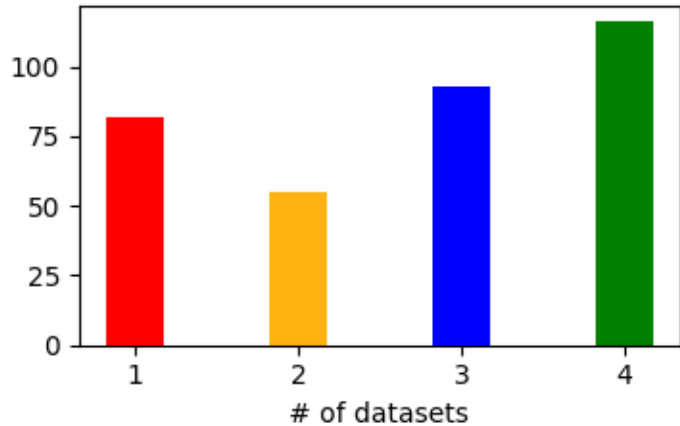

$\mathcal{M}^A$  neighbors

Localization of ADLL process

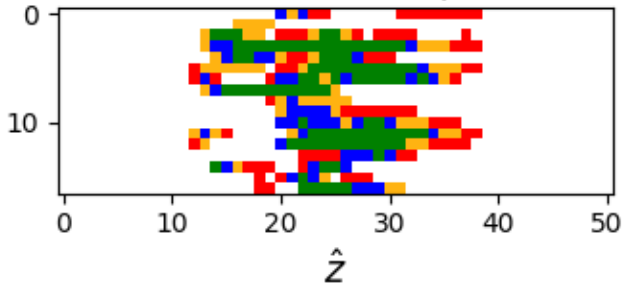

# of localized contacts

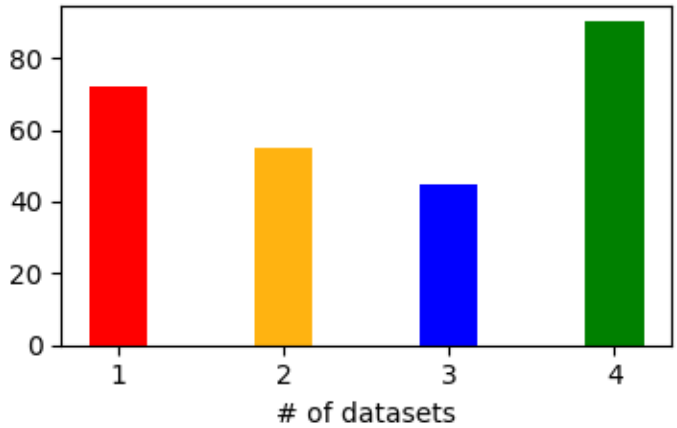

$\mathcal{M}^A$  neighbors

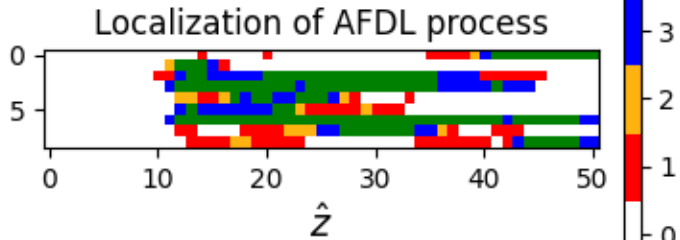

# of localized contacts

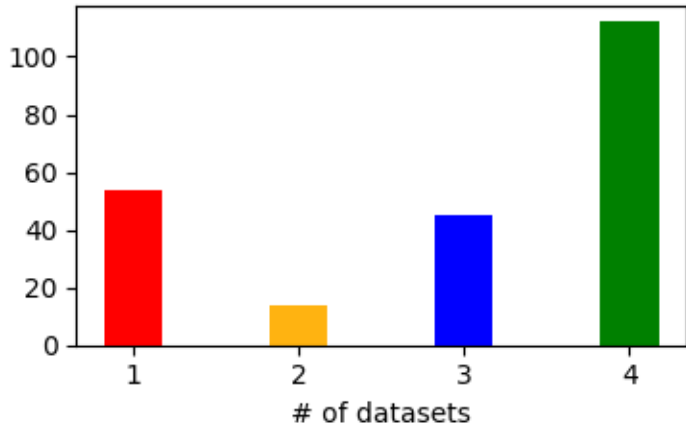

Localization of AIAL process

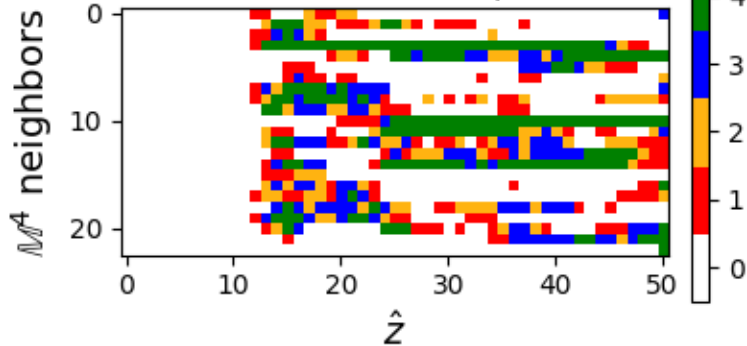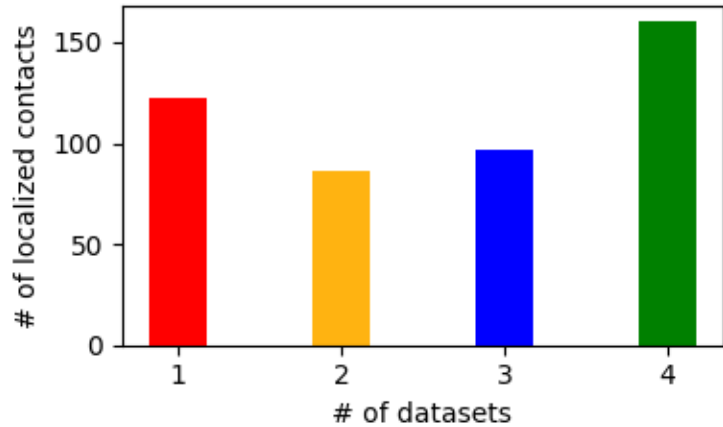

Localization of AIBL process

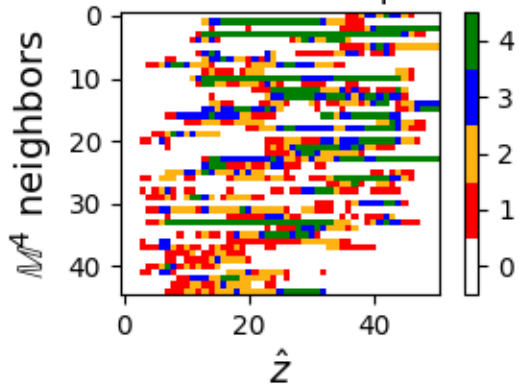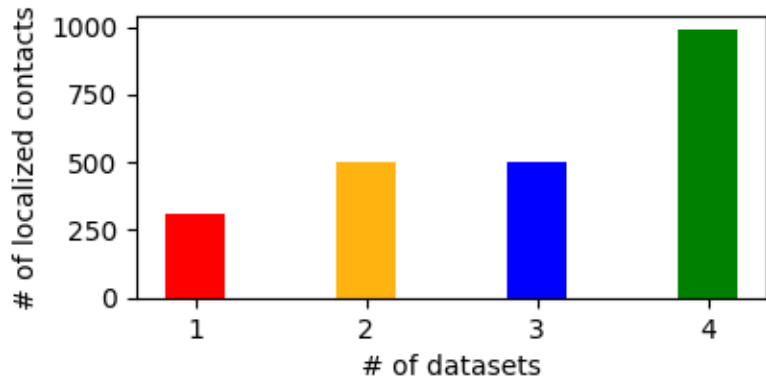

$\mathcal{M}^A$  neighbors

Localization of AIML process

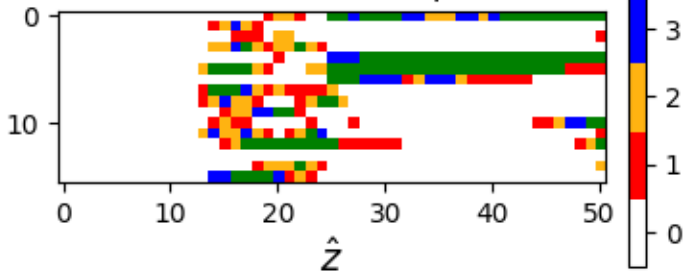

# of localized contacts

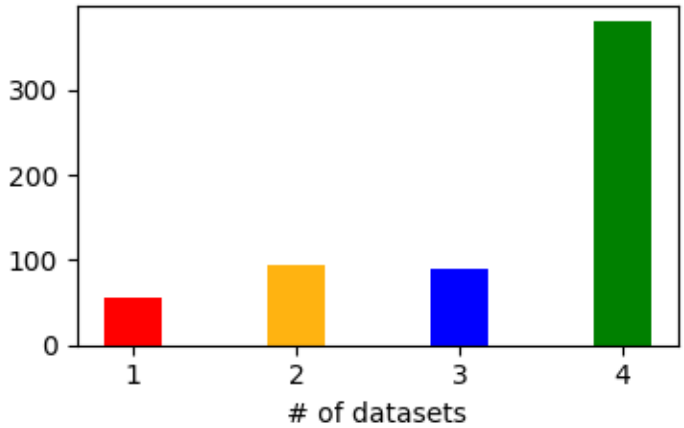



Localization of AINL process

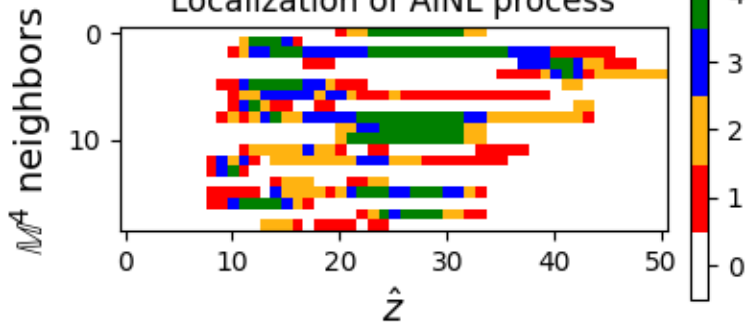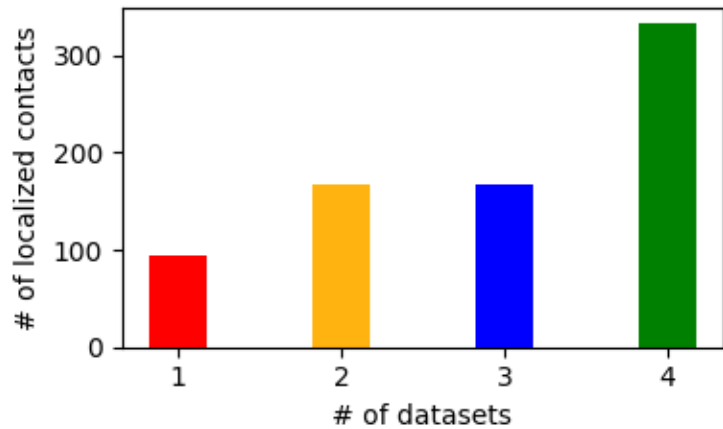

Localization of AIYL process

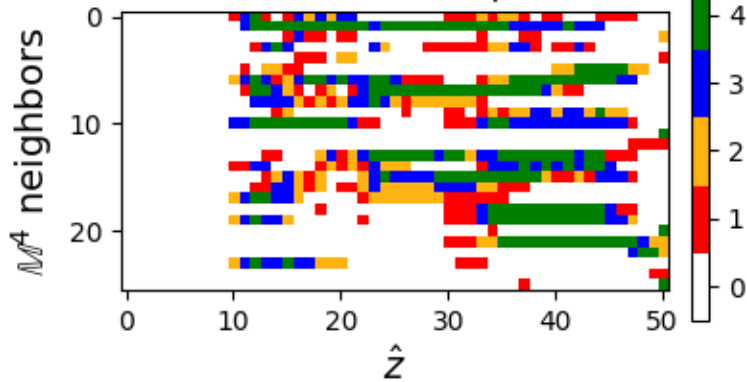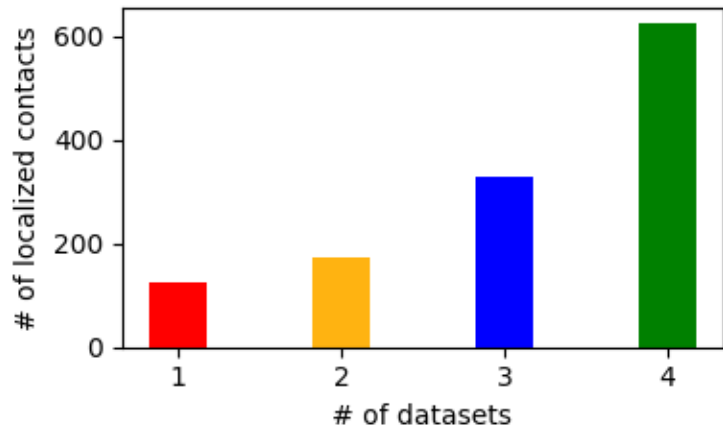

Localization of AIZL process

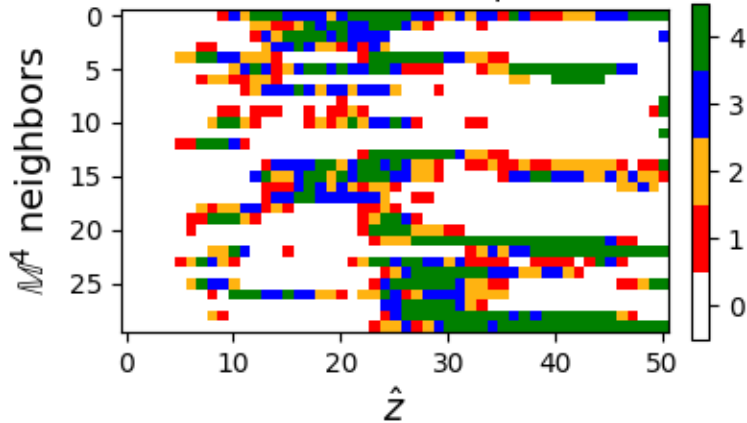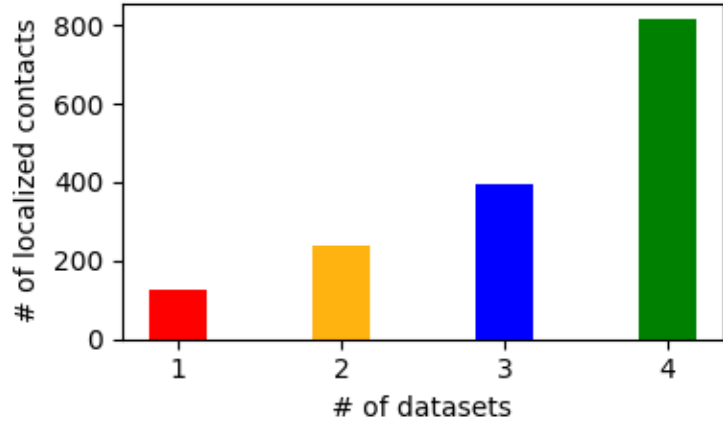

$\mathcal{M}^A$  neighbors

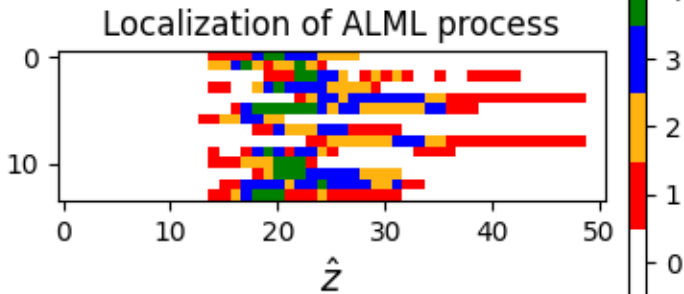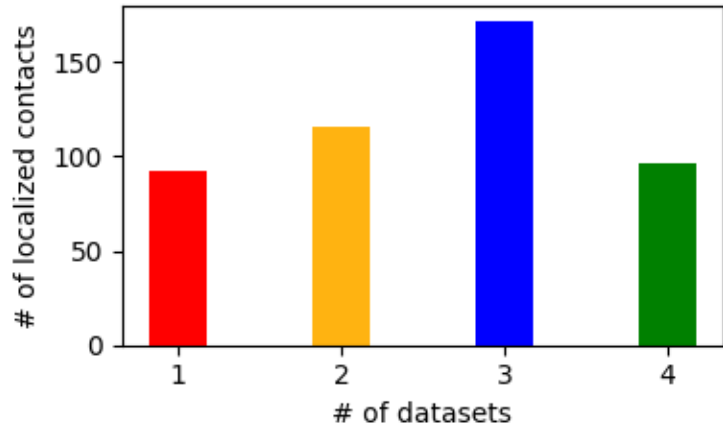

Localization of ALNL process

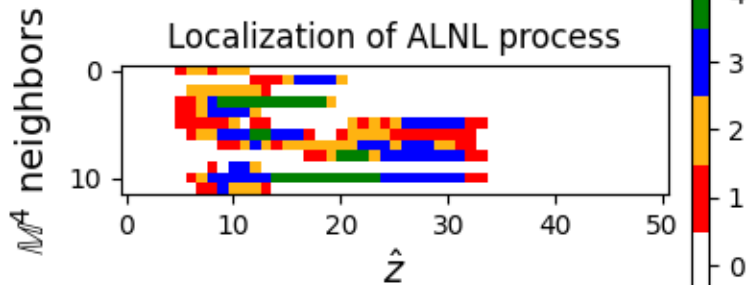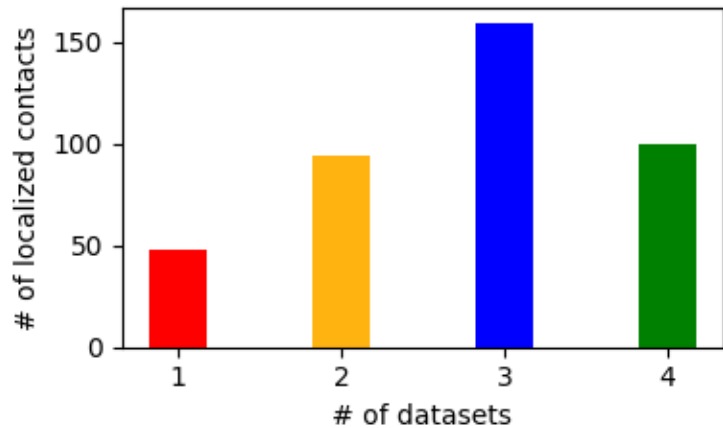

Localization of ASEL process

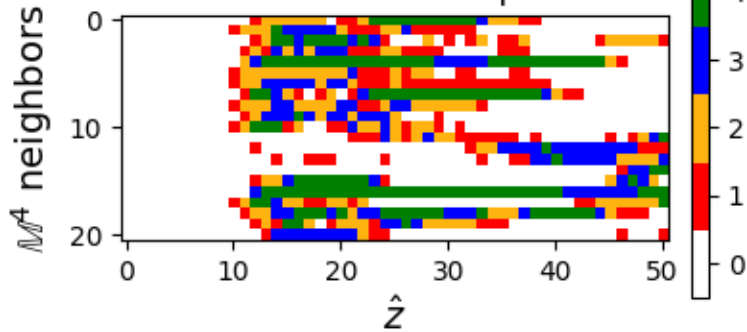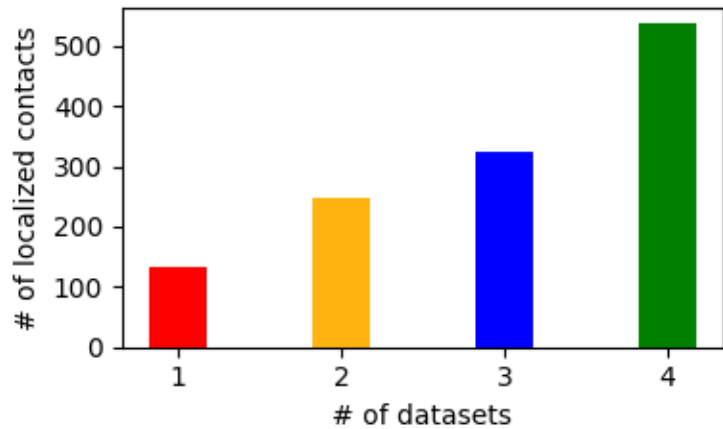

$\mathcal{M}^A$  neighbors

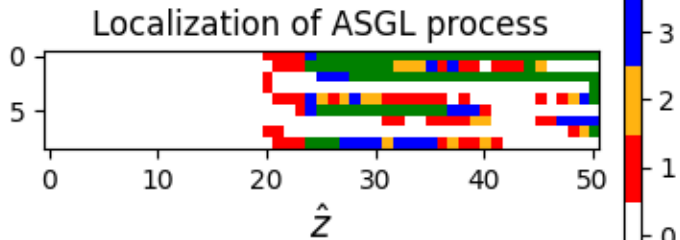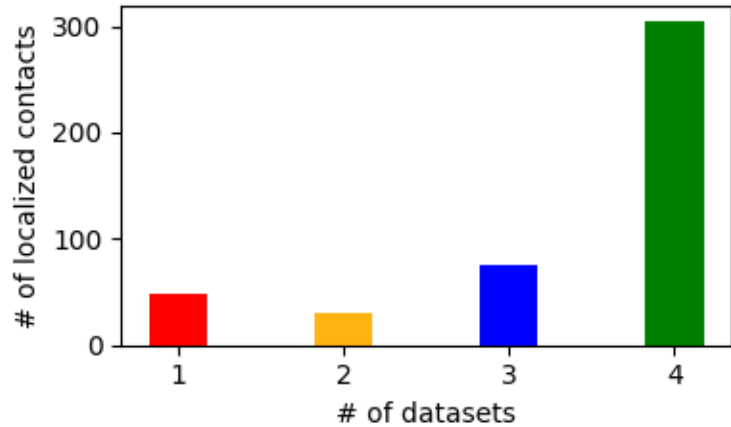

Localization of ASHL process

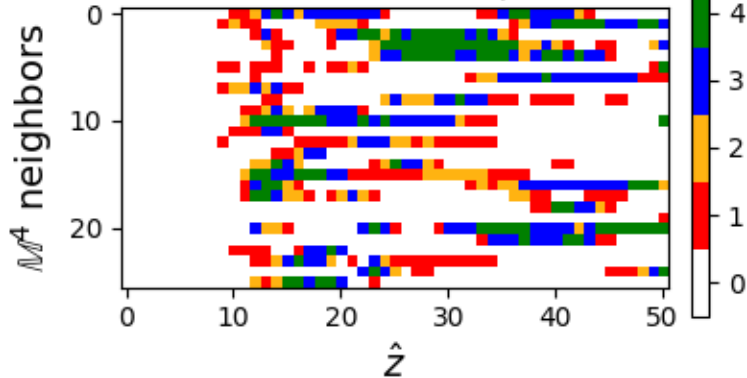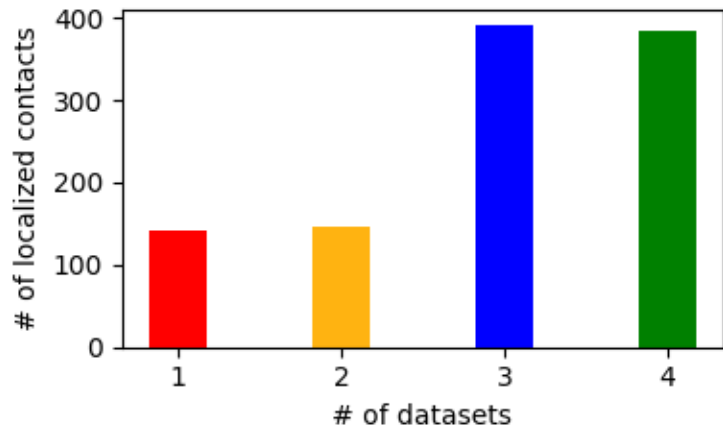



$\mathcal{M}^A$  neighbors

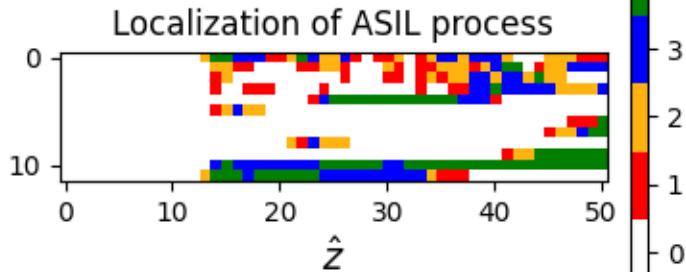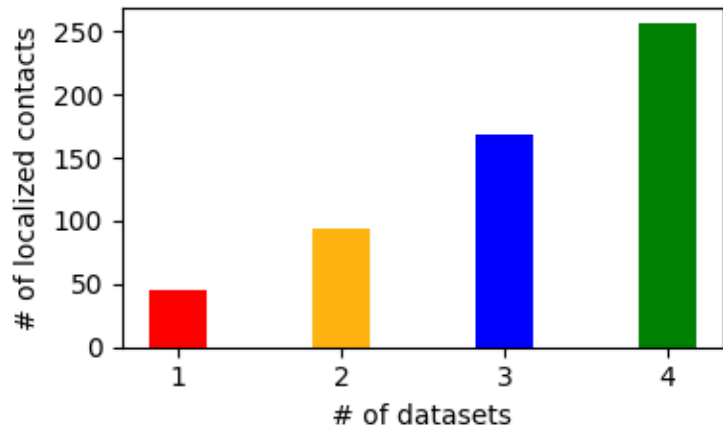

$\mathcal{M}^A$  neighbors

Localization of ASJL process

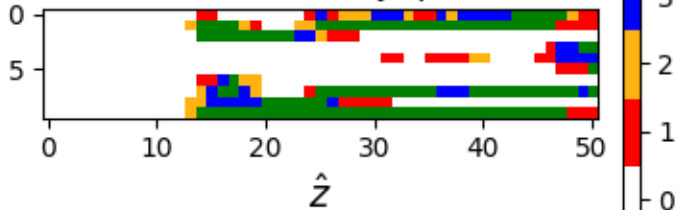

# of localized contacts

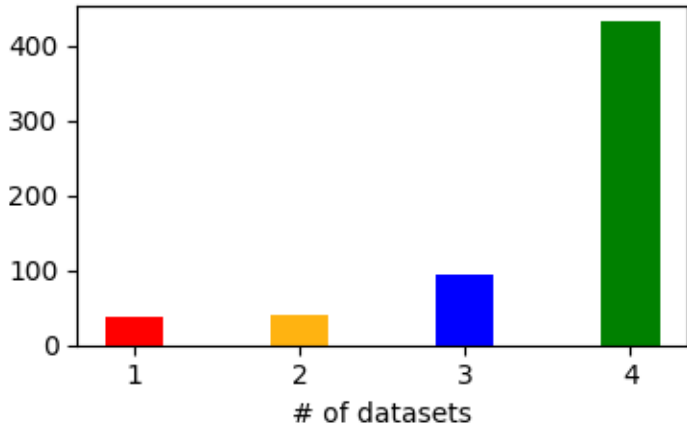

$\mathcal{M}^A$  neighbors

Localization of ASKL process

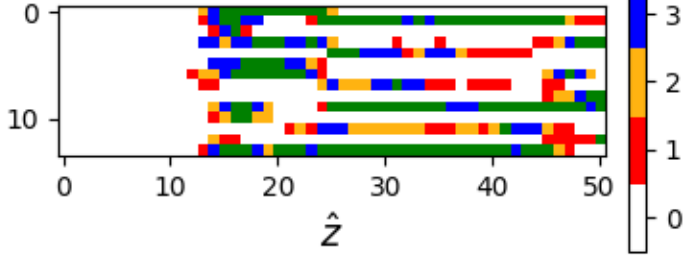

# of localized contacts

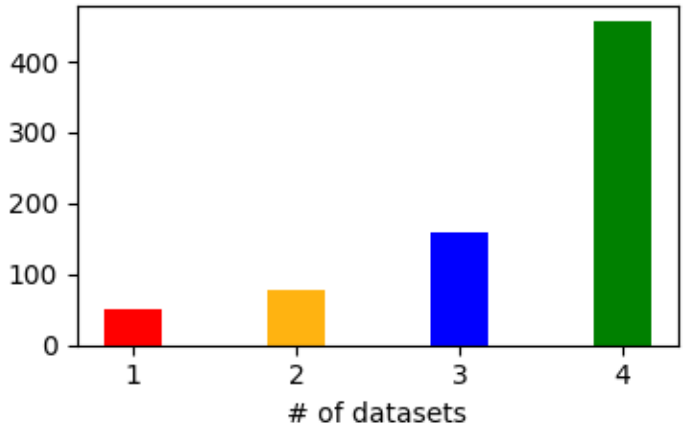

Localization of AUAL process

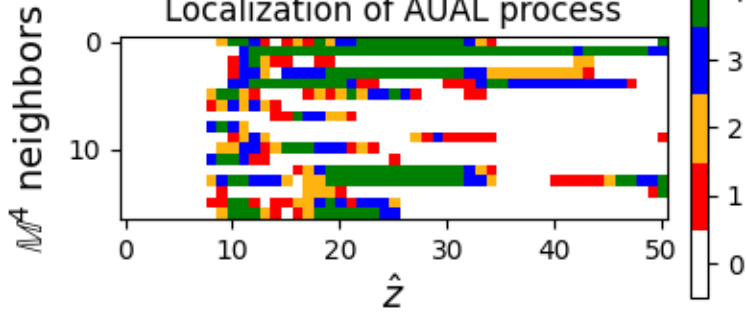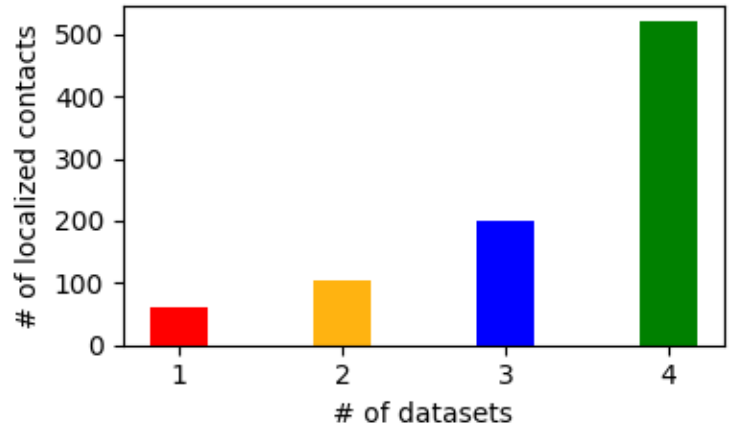

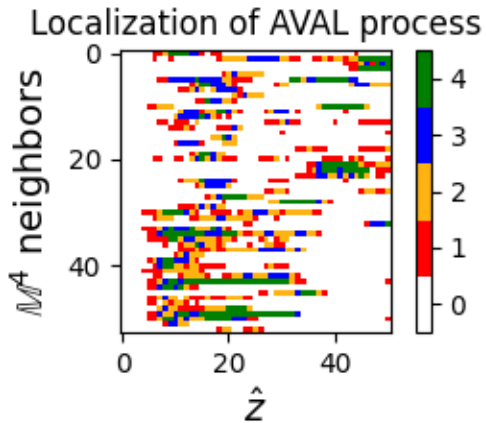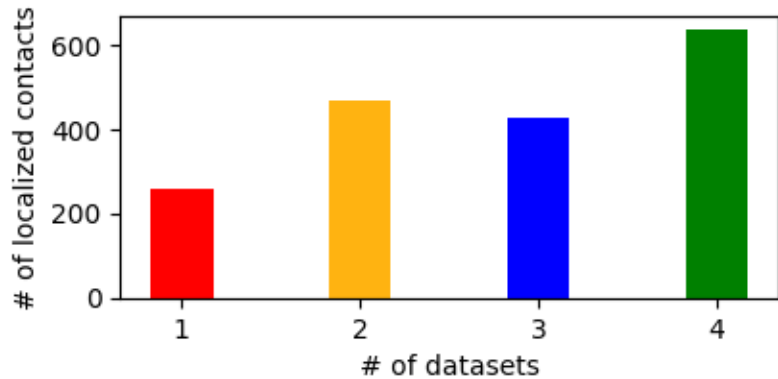

Localization of AVBL process

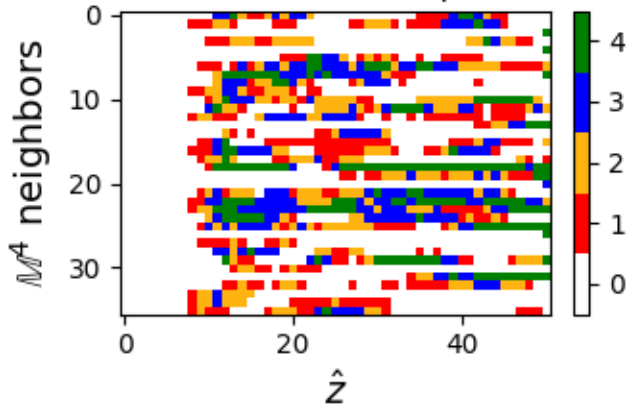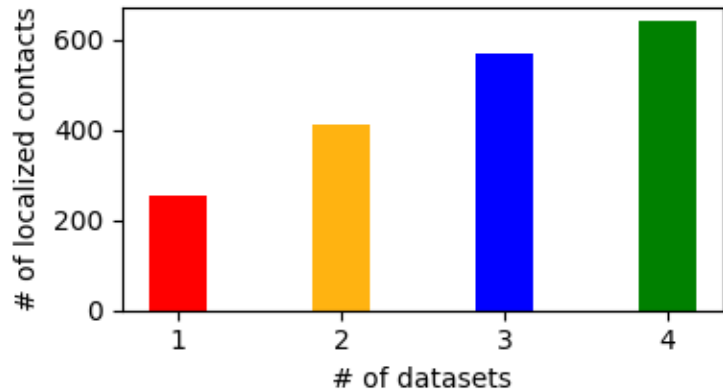

Localization of AVDL process

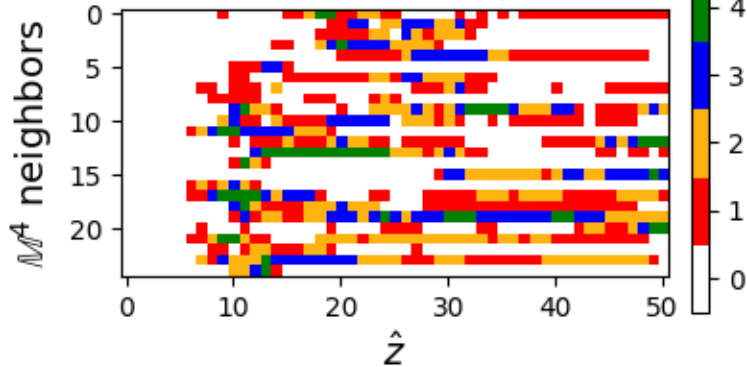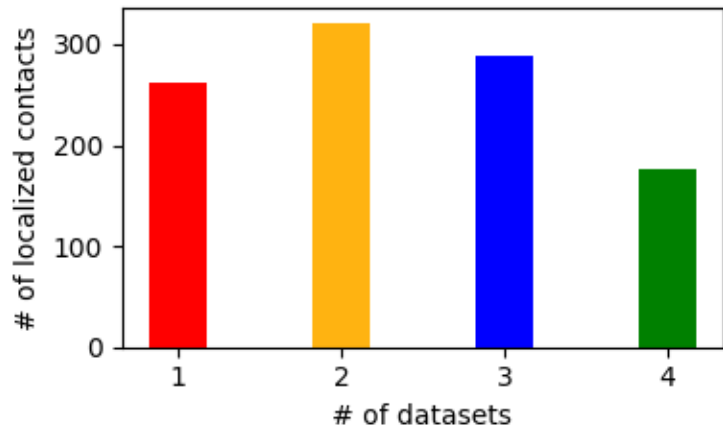

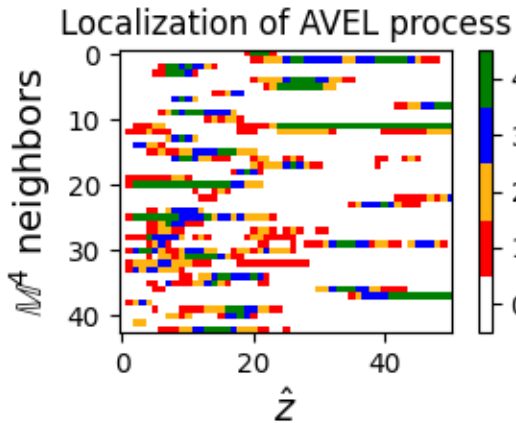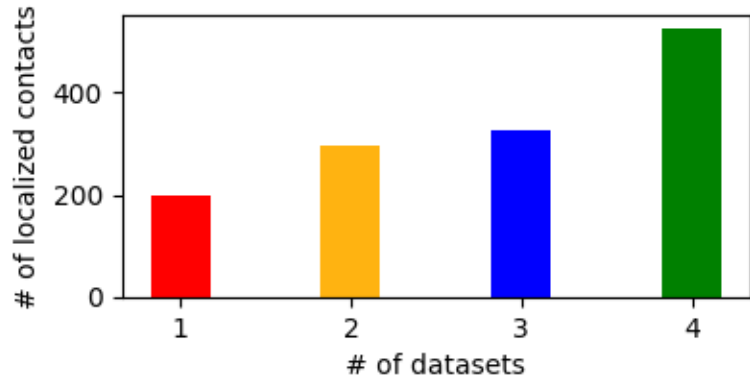



$M^4$  neighbors

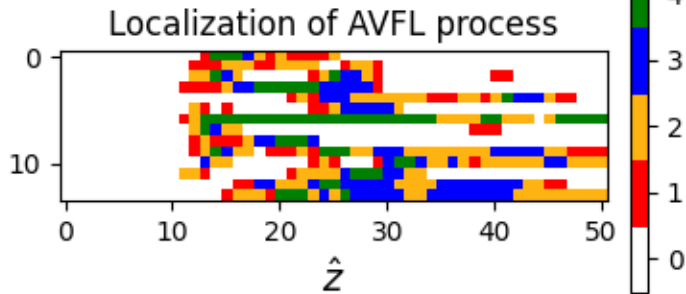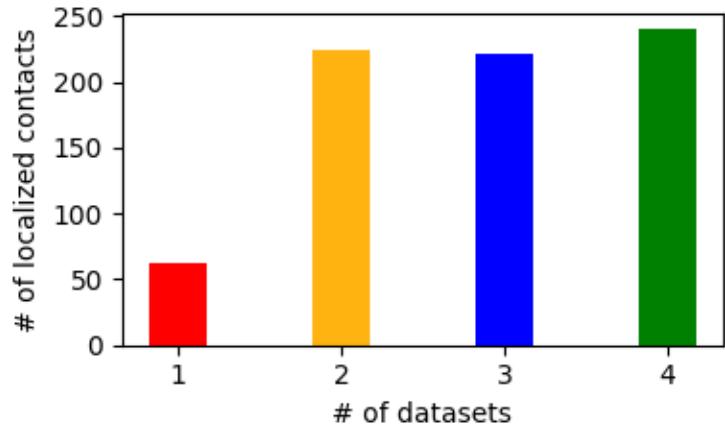

Localization of AVHL process

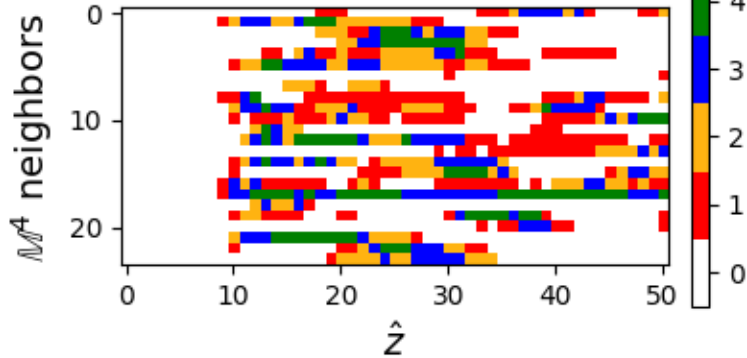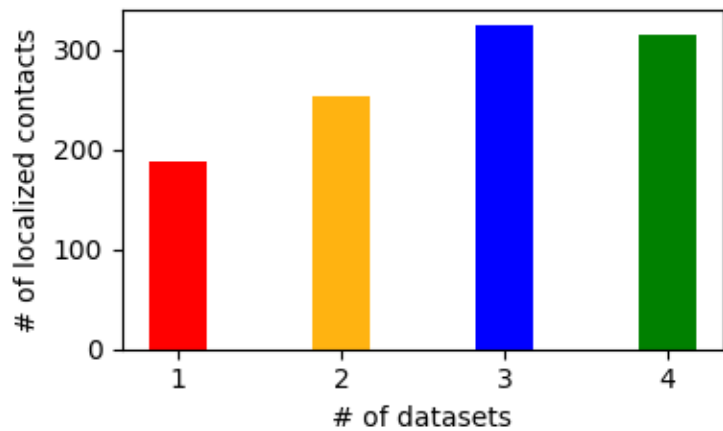

Localization of AVJL process

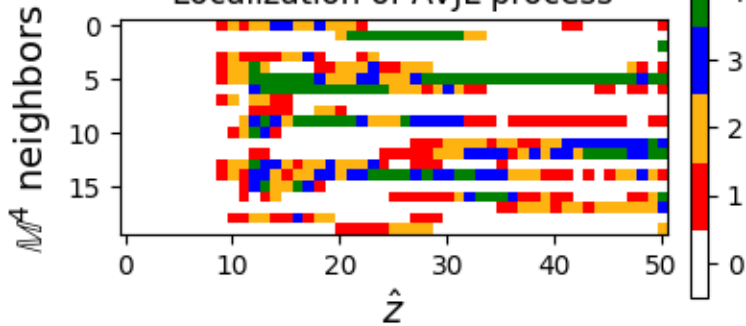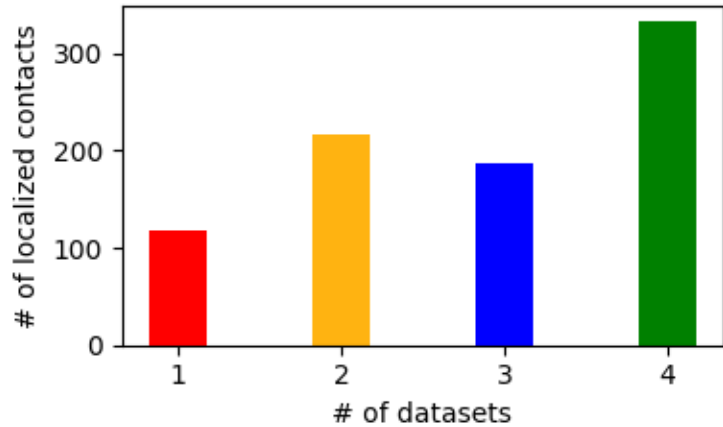

Localization of AVKL process

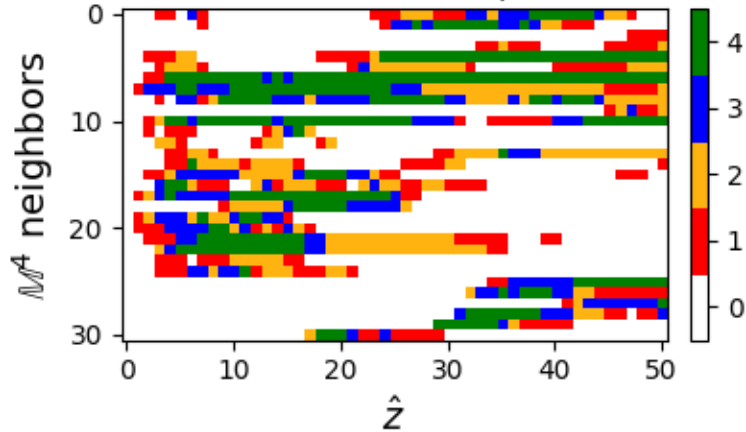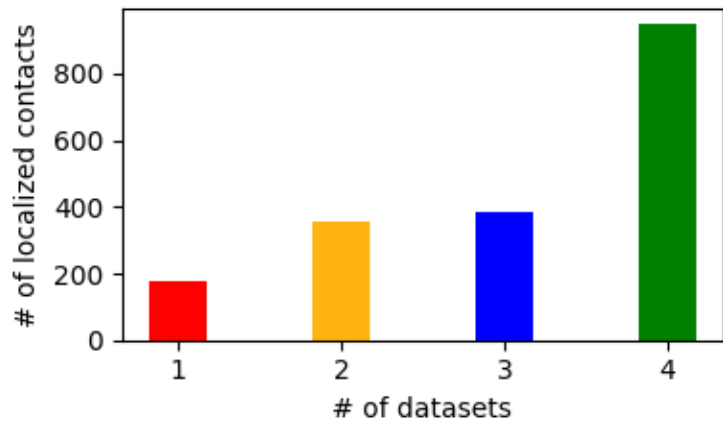

$\mathcal{M}^A$  neighbors

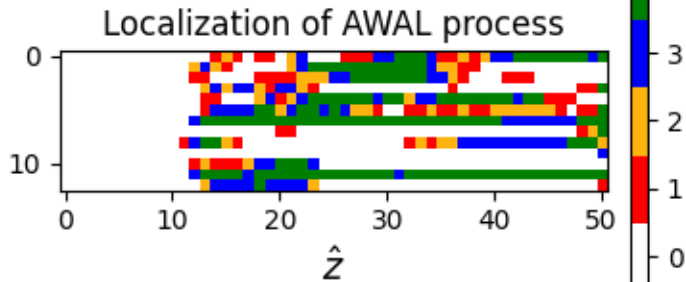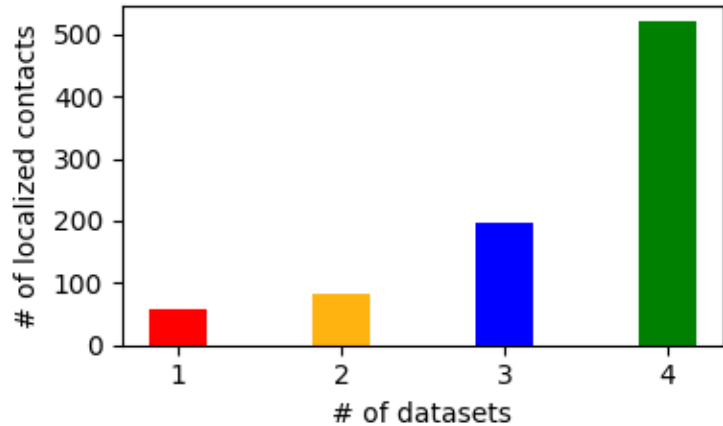

$\mathcal{M}^A$  neighbors

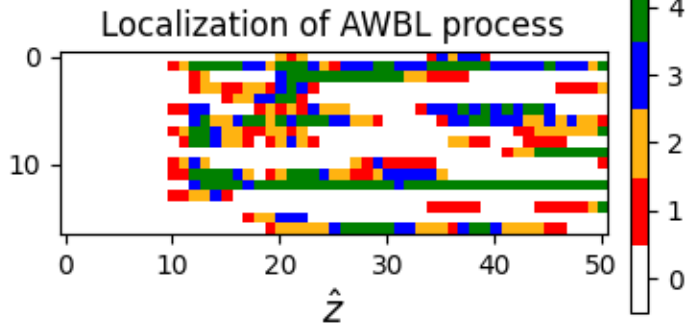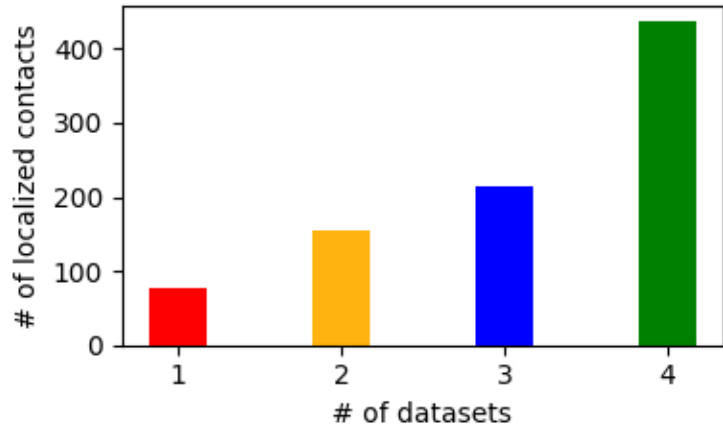

Localization of AWCL process

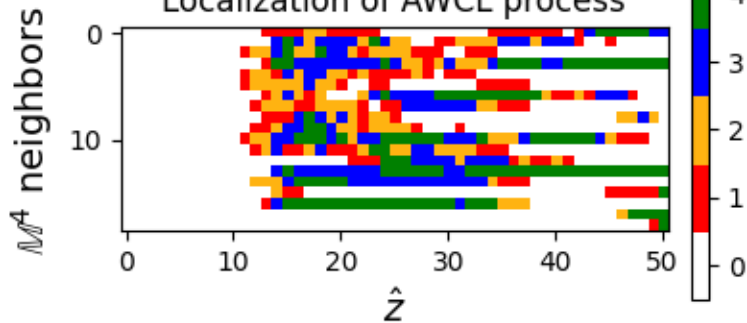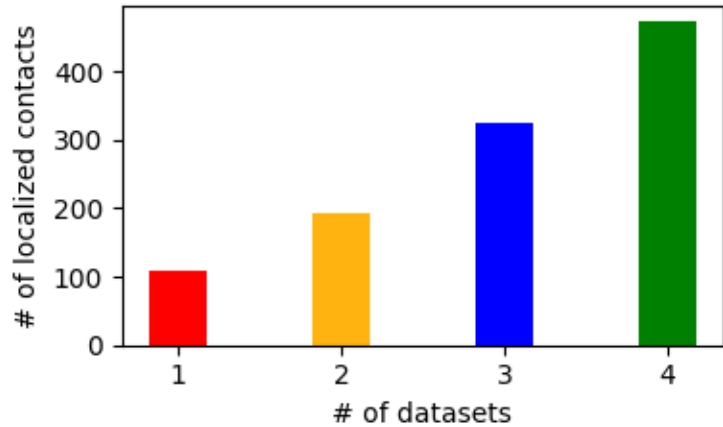

Localization of BAGL process

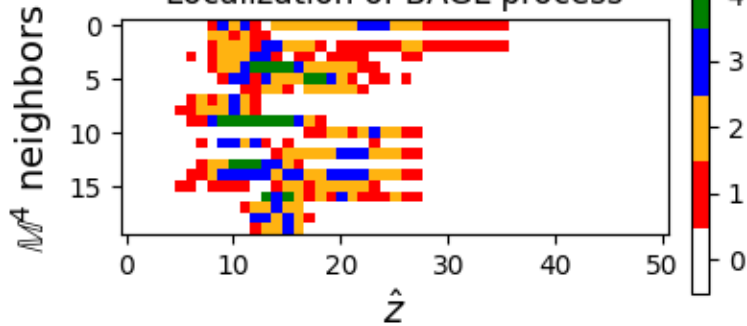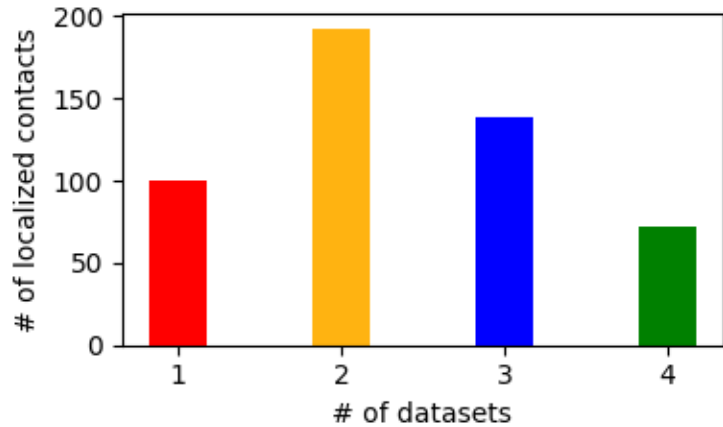



$\mathcal{M}^A$  neighbors

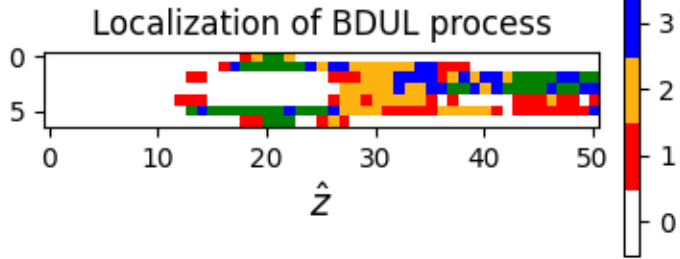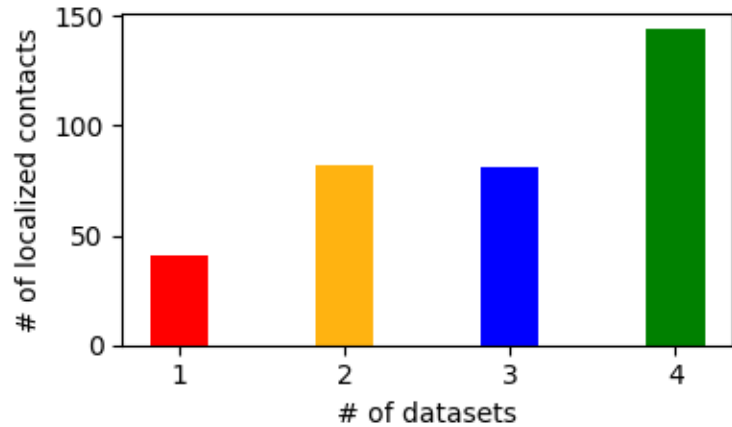

Localization of CEPDL process

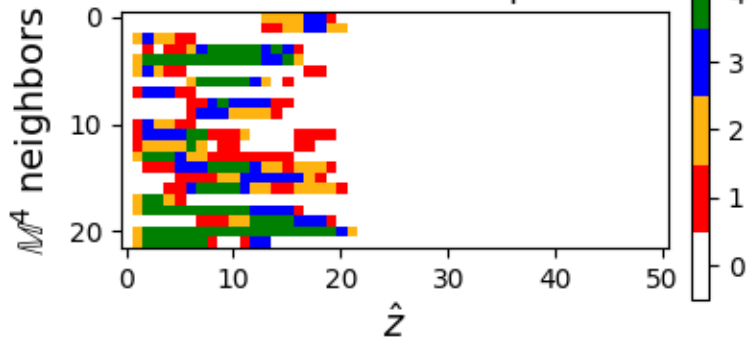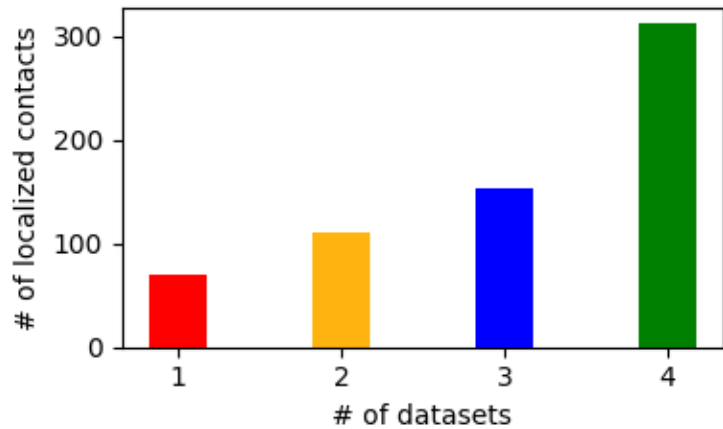

$\mathcal{M}^A$  neighbors

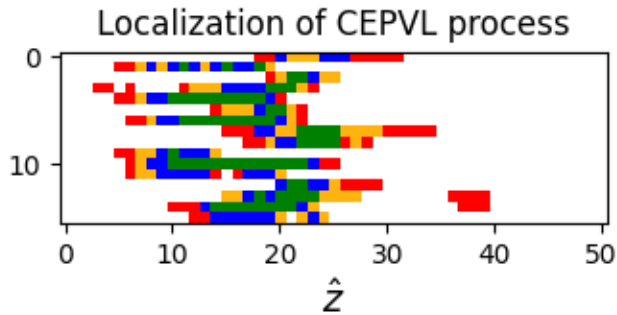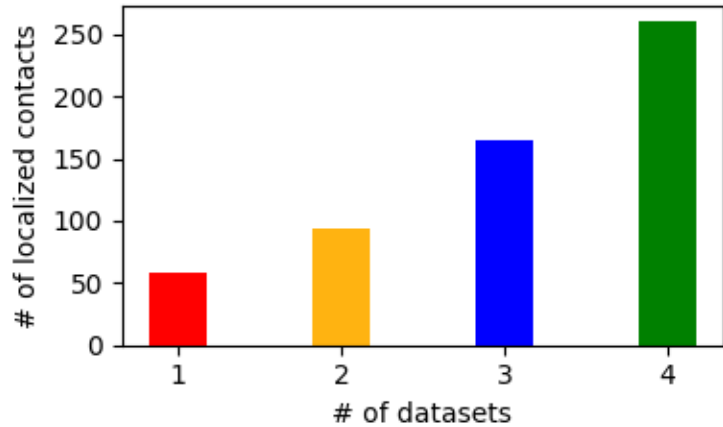

$\mathcal{M}^A$  neighbors

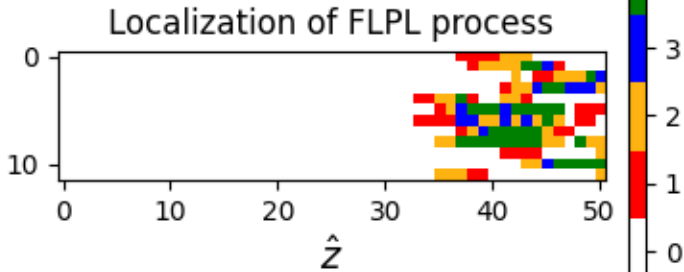

# of localized contacts

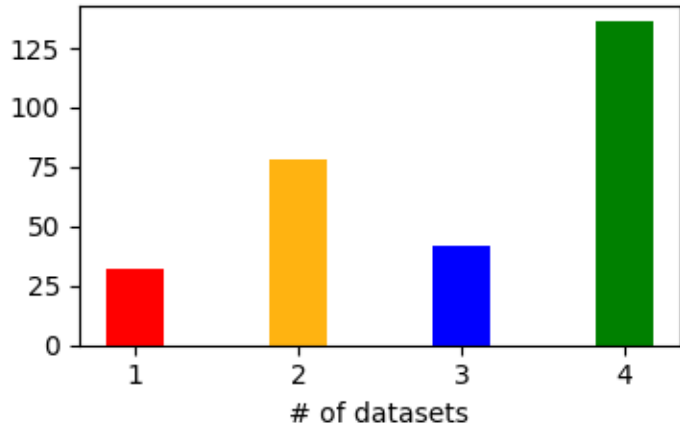

$\mathcal{M}^A$  neighbors

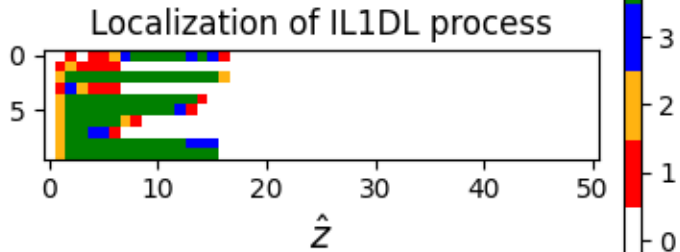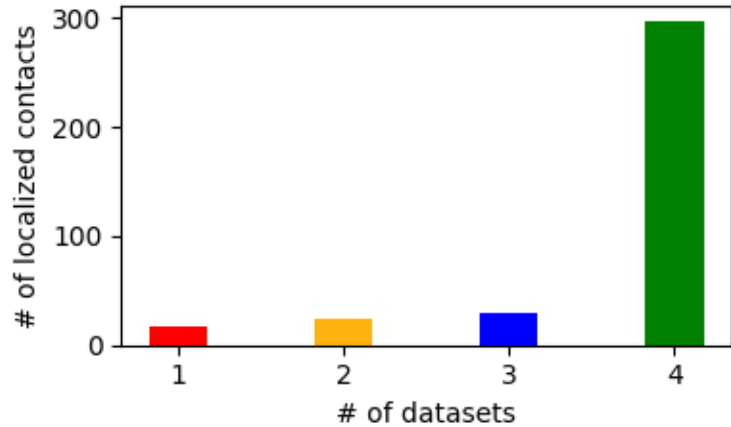

Localization of IL1L process

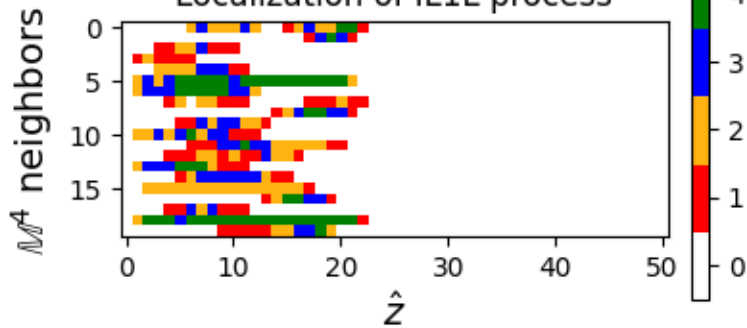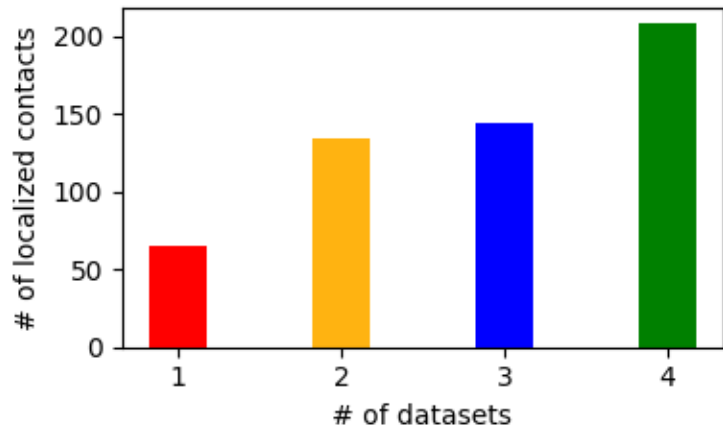

$\mathcal{M}^A$  neighbors

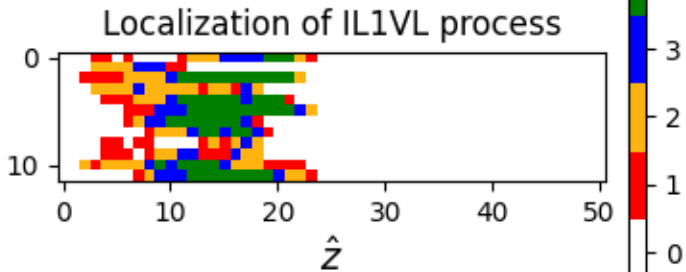

# of localized contacts

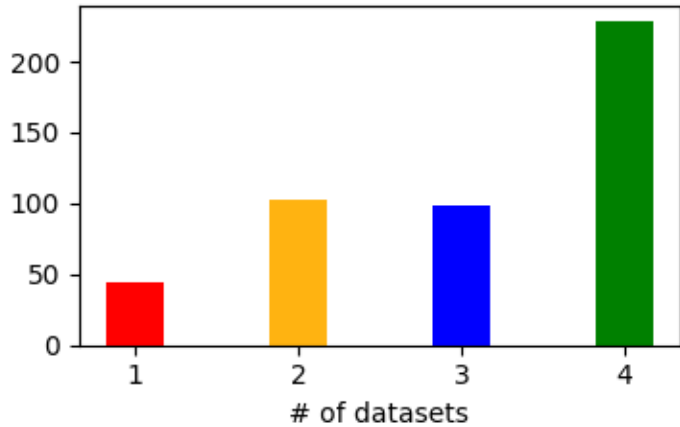

$M^A$  neighbors

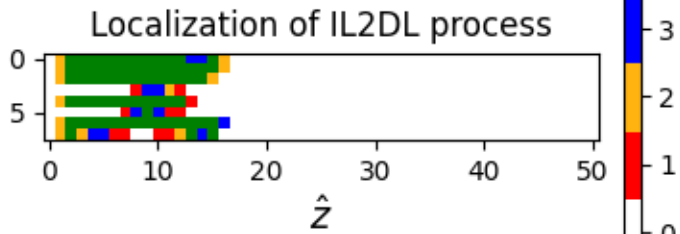

# of localized contacts

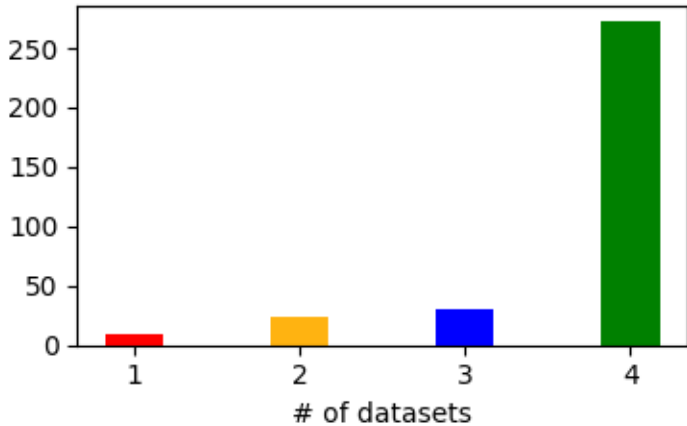



$\mathcal{M}^A$  neighbors

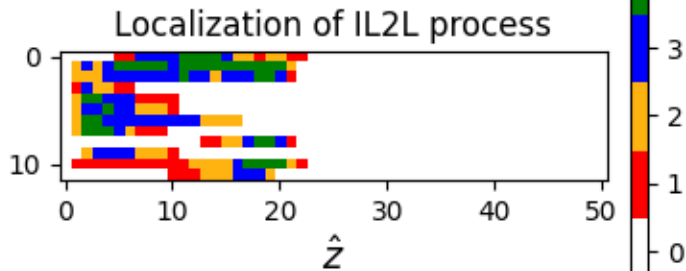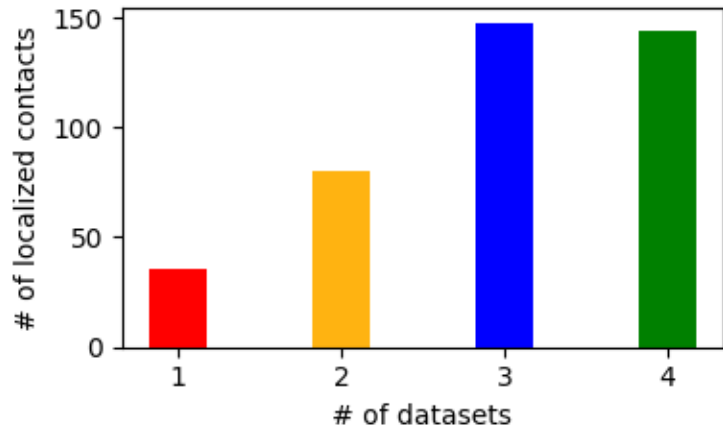

$\mathcal{M}^A$  neighbors

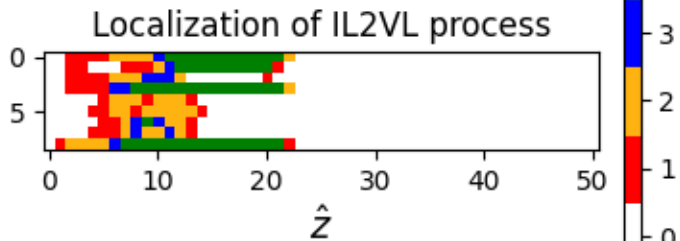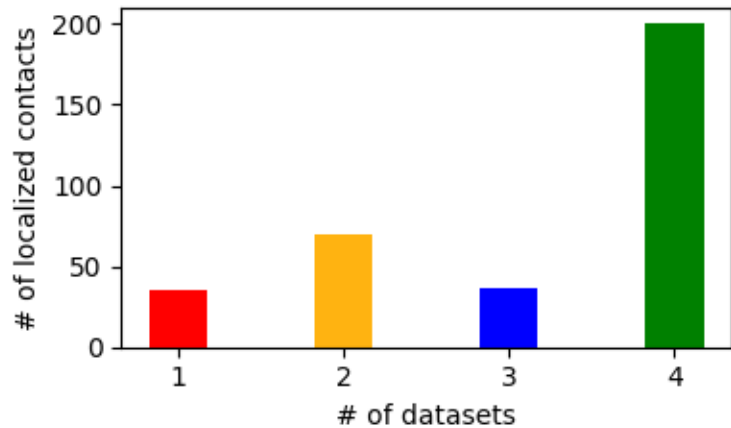

Localization of OLLL process

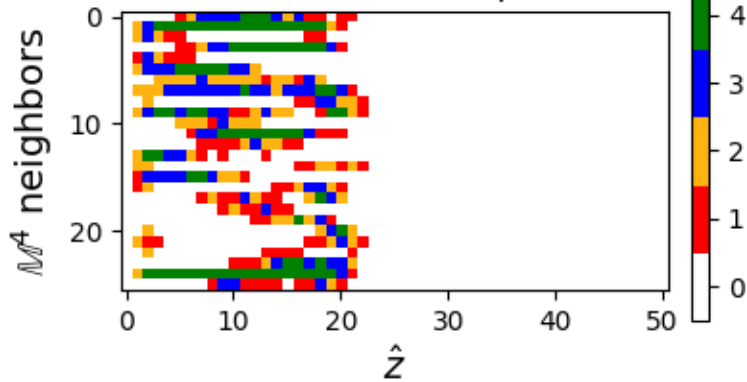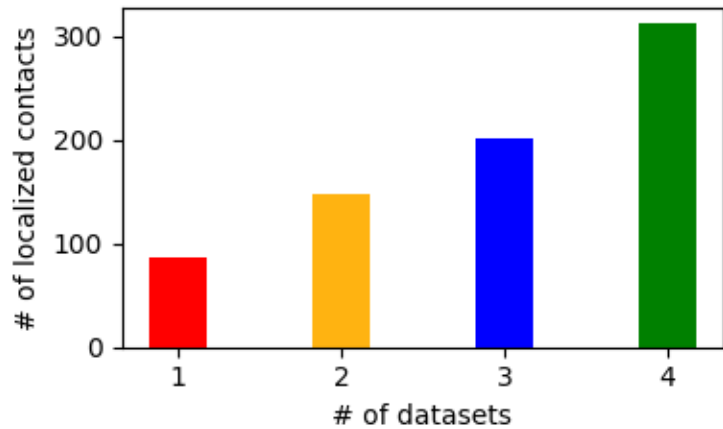

$\mathcal{M}^A$  neighbors

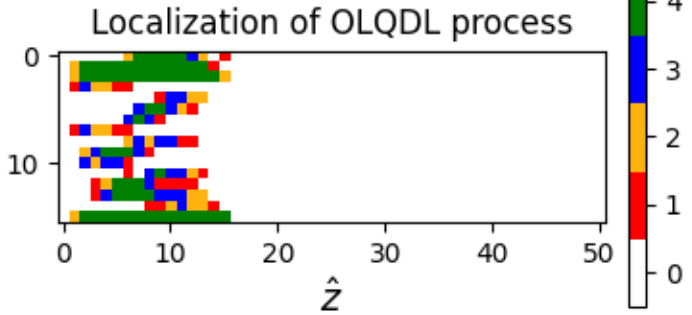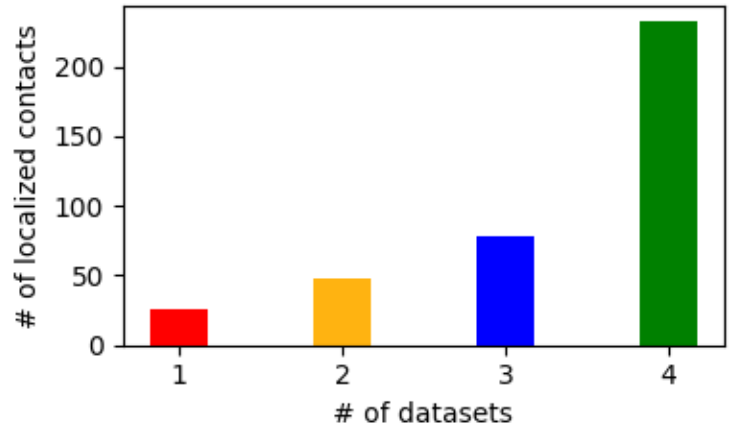

Localization of OLQVL process

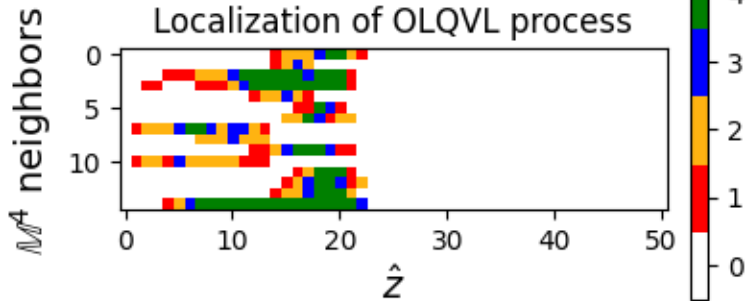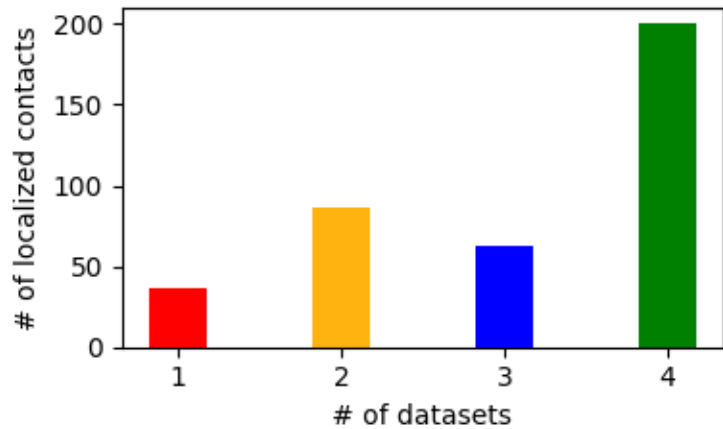

Localization of PVCL process

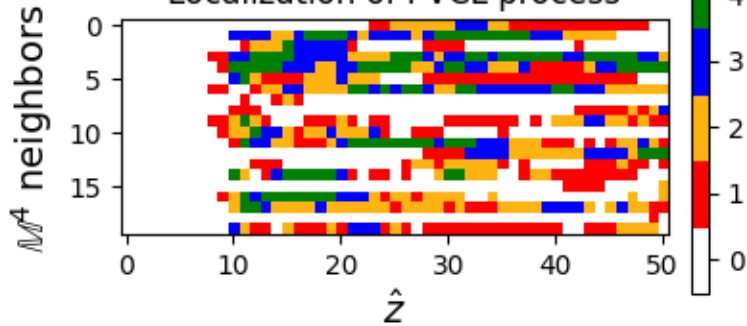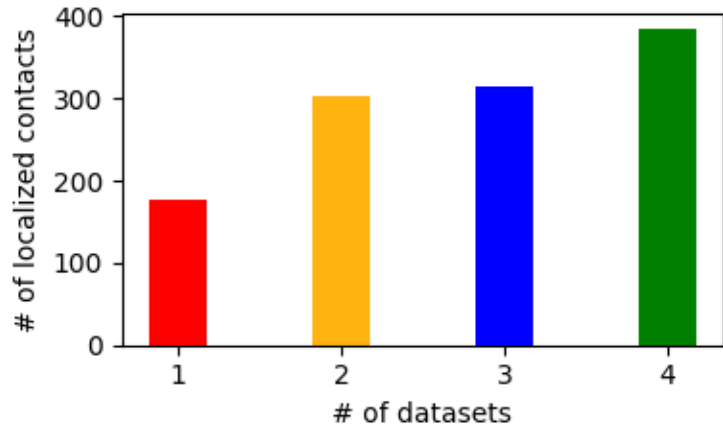

$\mathcal{M}^A$  neighbors

Localization of PVPL process

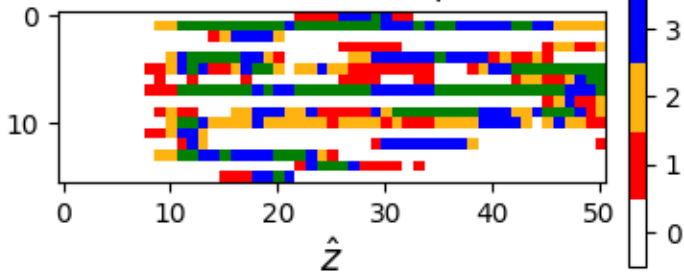

# of localized contacts

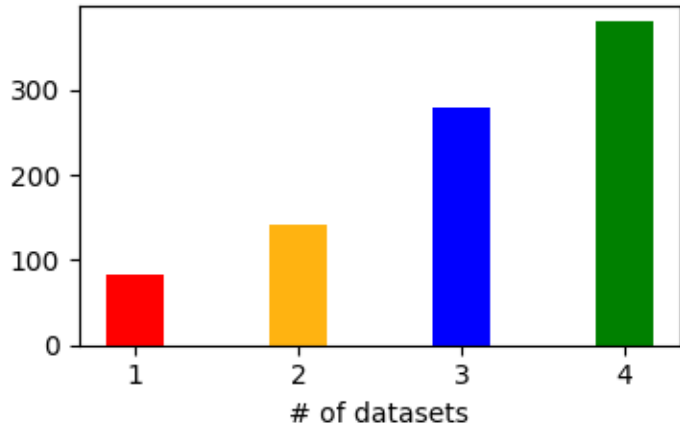

$M^A$  neighbors

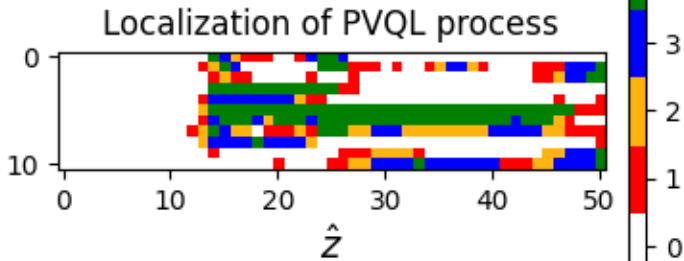

# of localized contacts

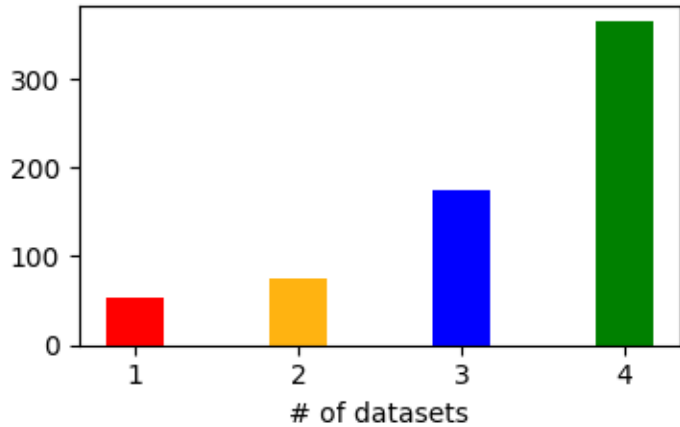



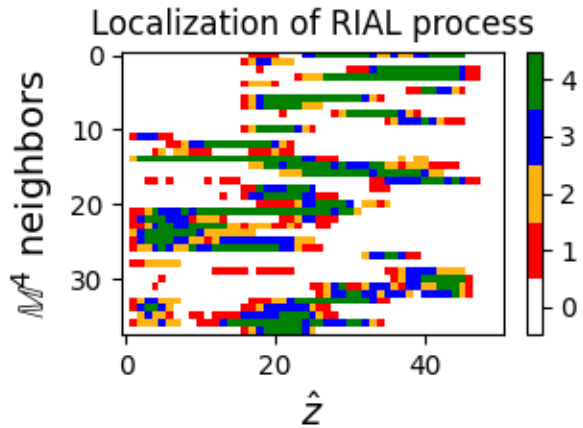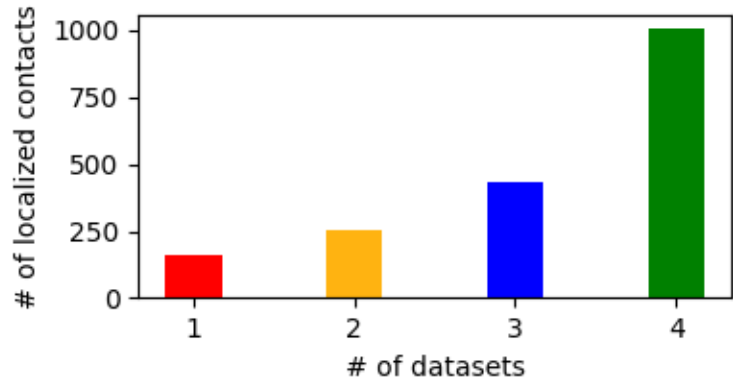

Localization of RIBL process

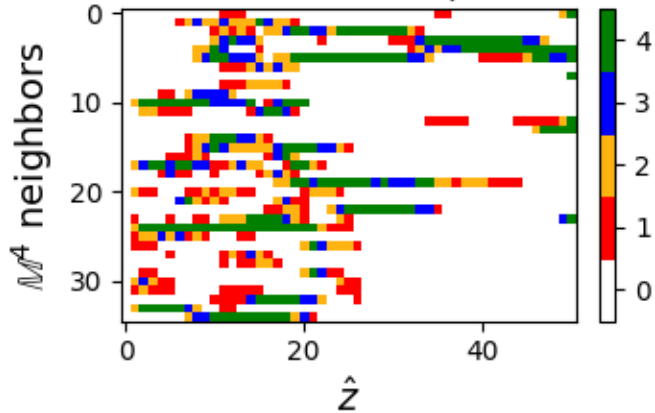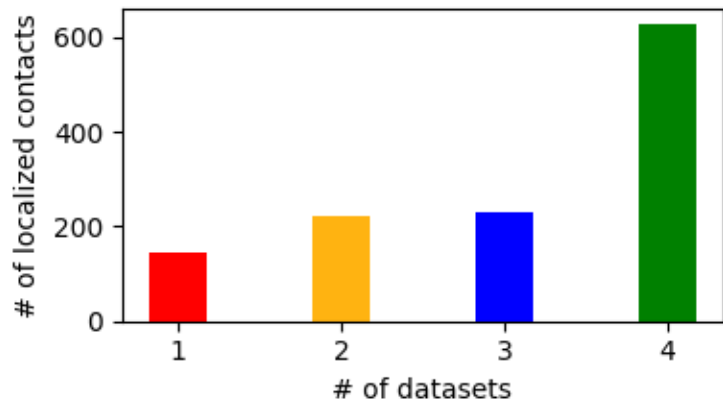

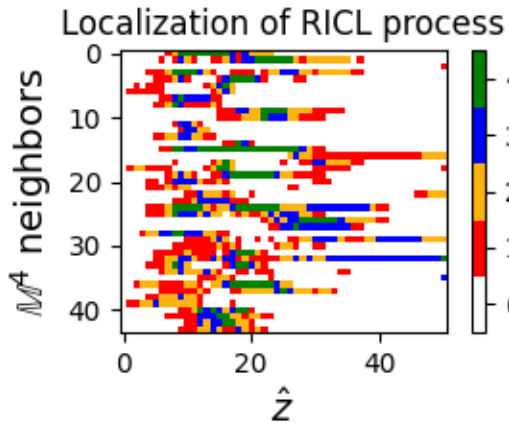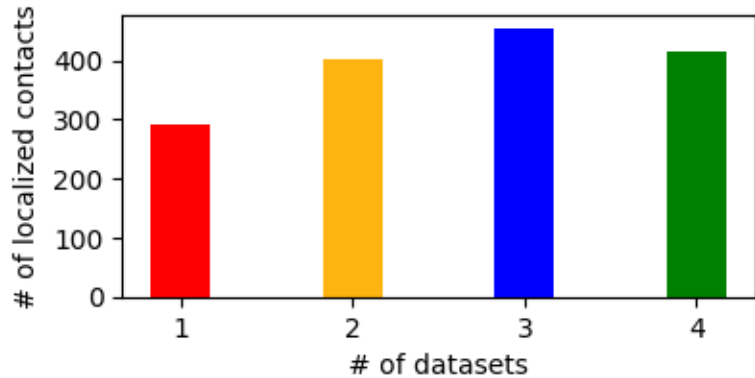

Localization of RIFL process

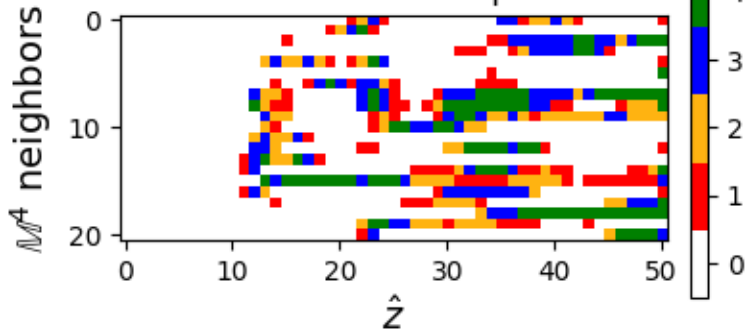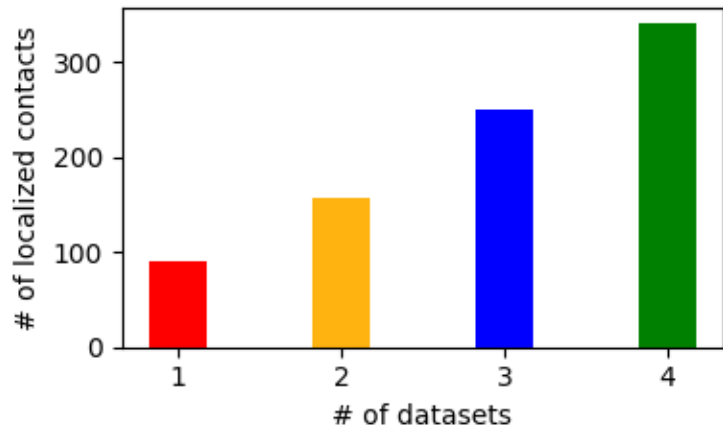

Localization of RIGL process

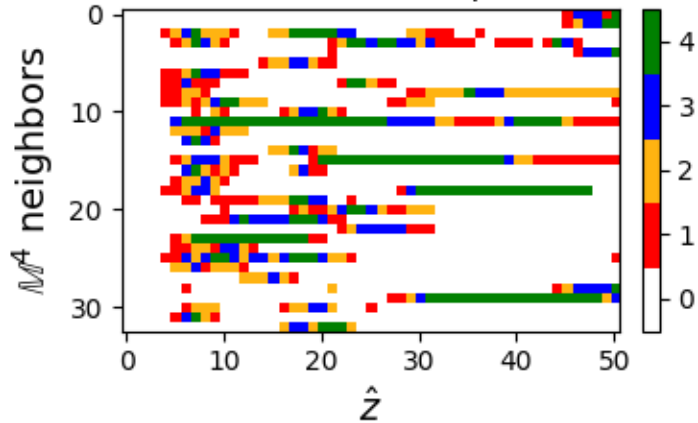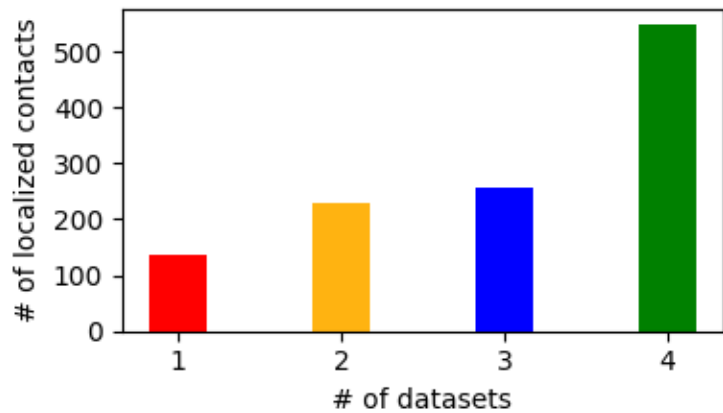

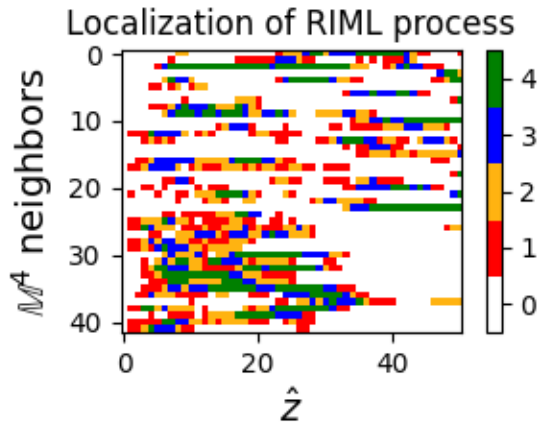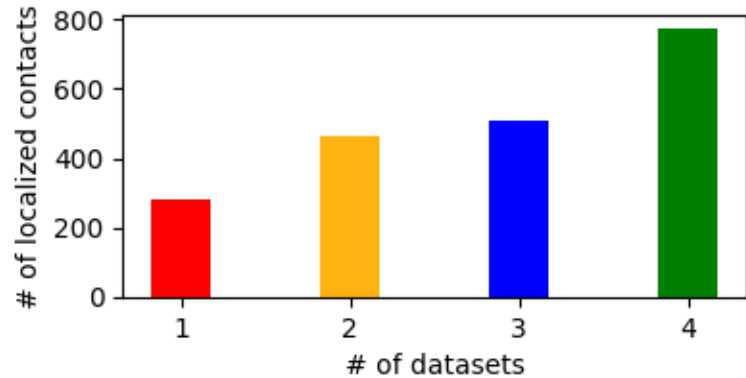

$\mathcal{M}^A$  neighbors

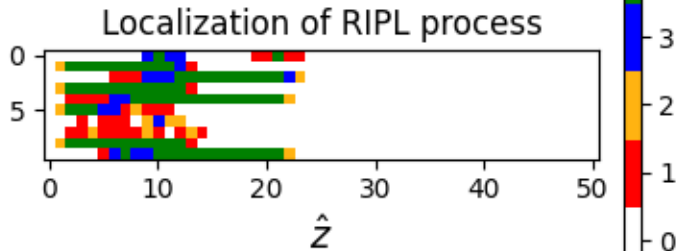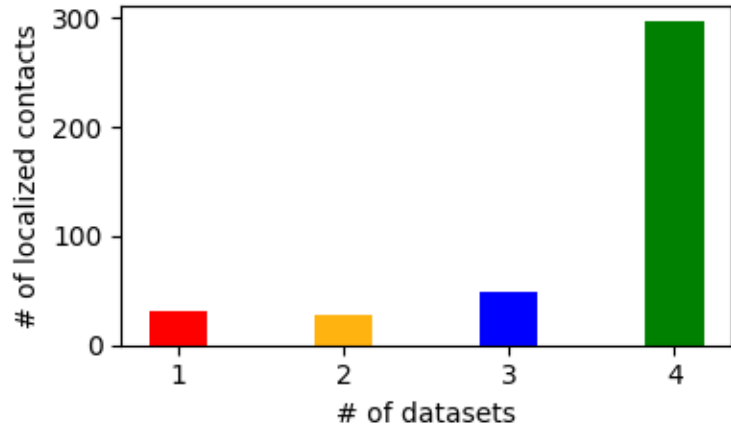

Localization of RIVL process

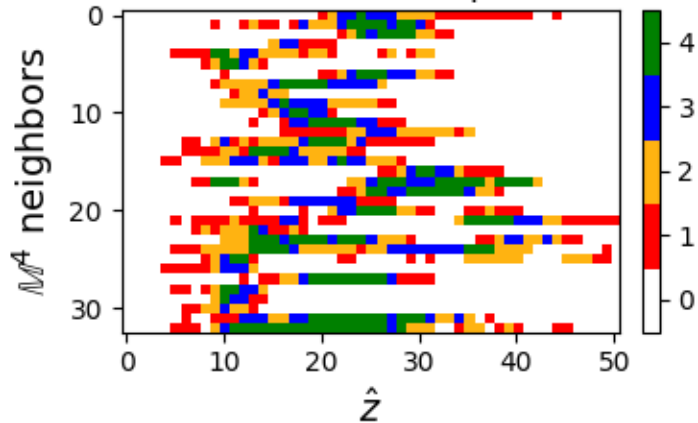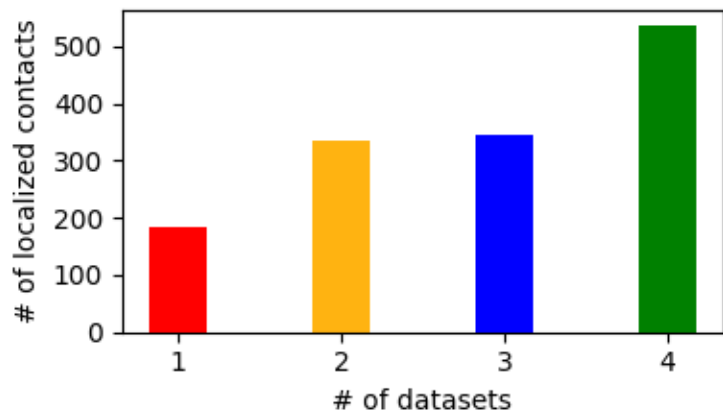



Localization of RMDDL process

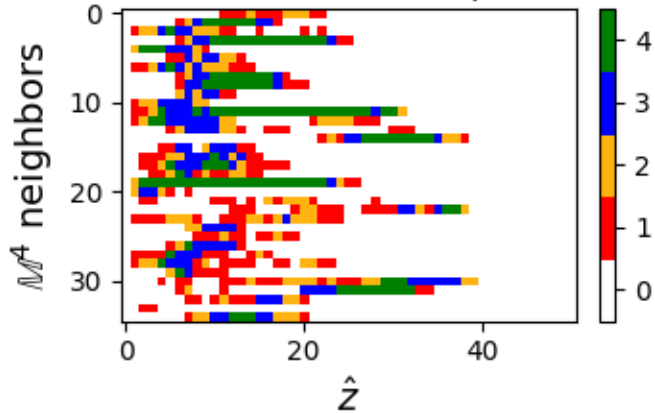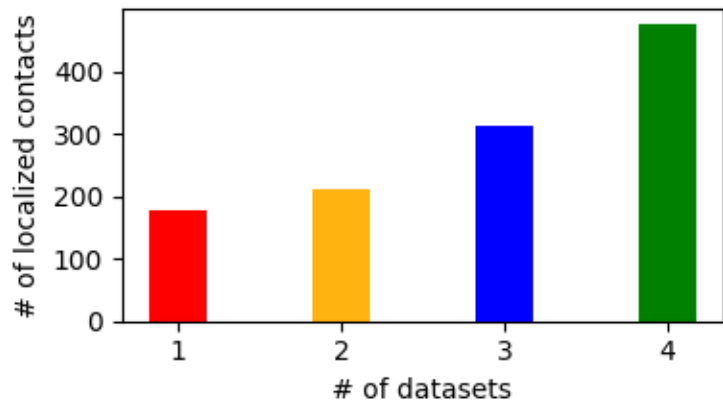

Localization of RMDL process

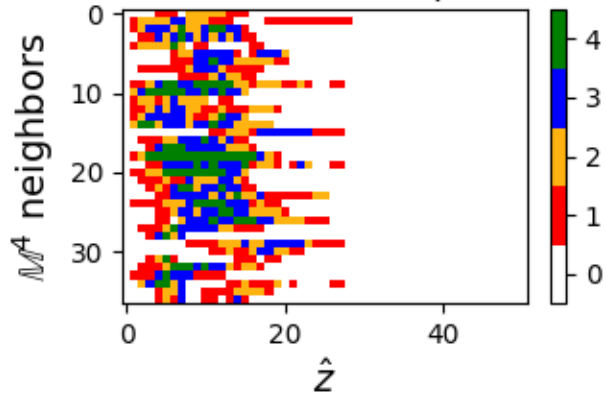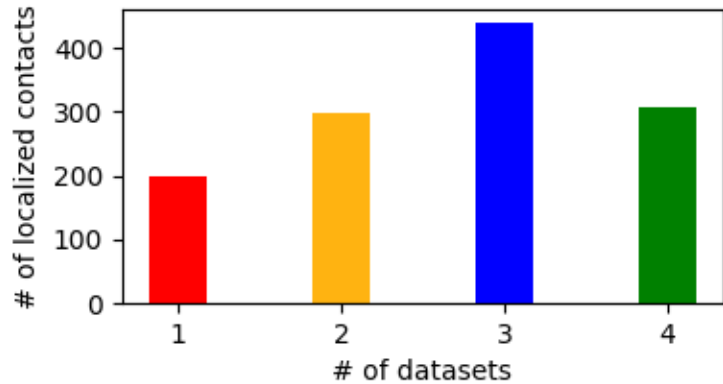

Localization of RMDVL process

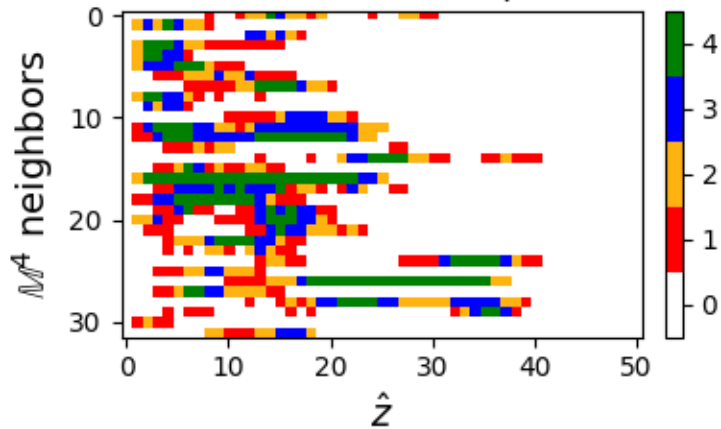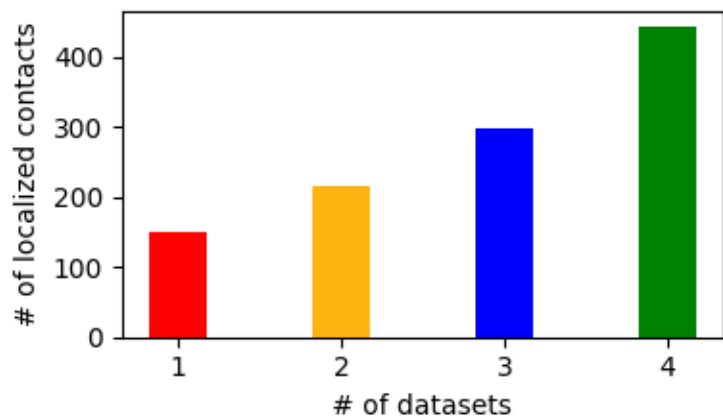

$\mathcal{M}^A$  neighbors

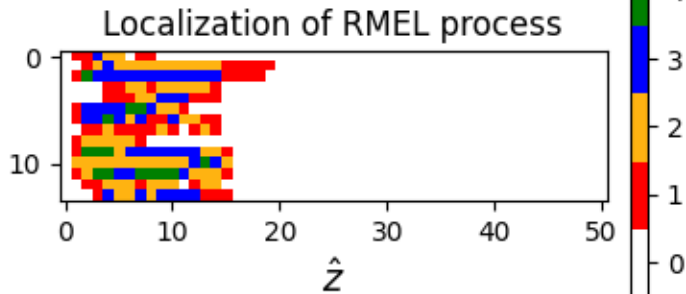

# of localized contacts

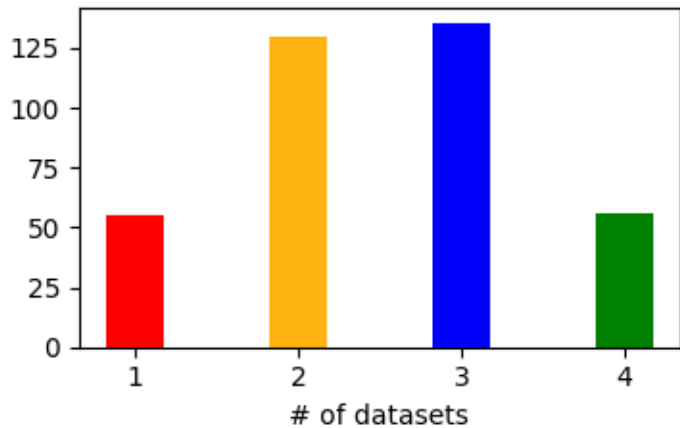

$\mathcal{M}^A$  neighbors

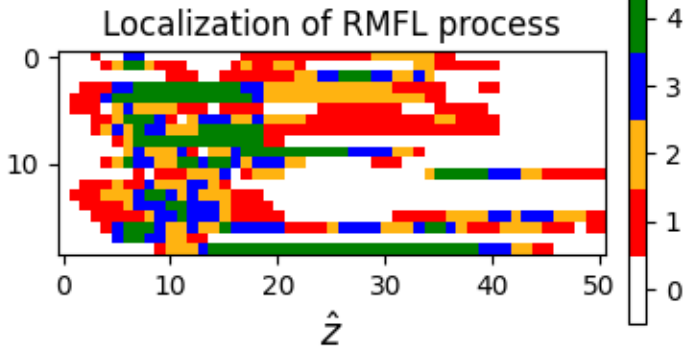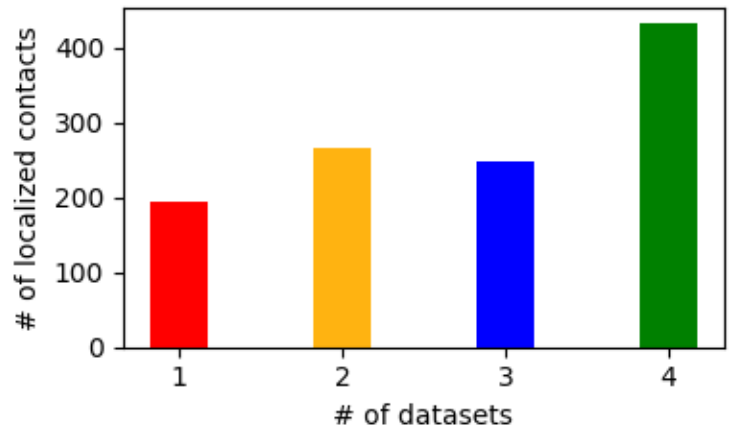

Localization of RMGL process

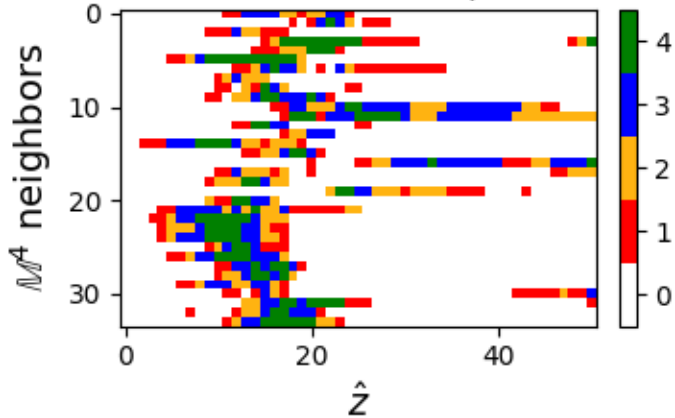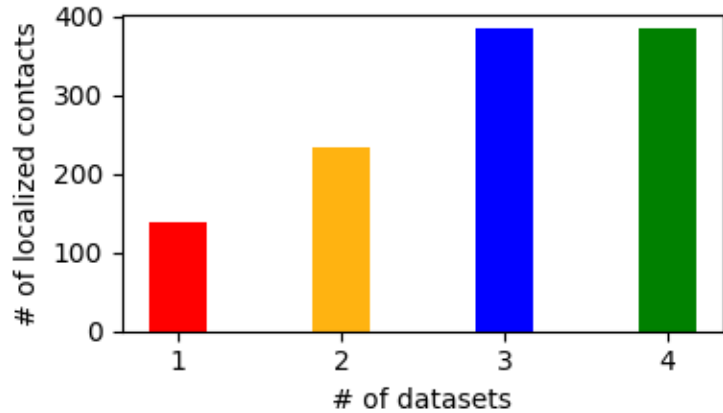

Localization of RMHL process

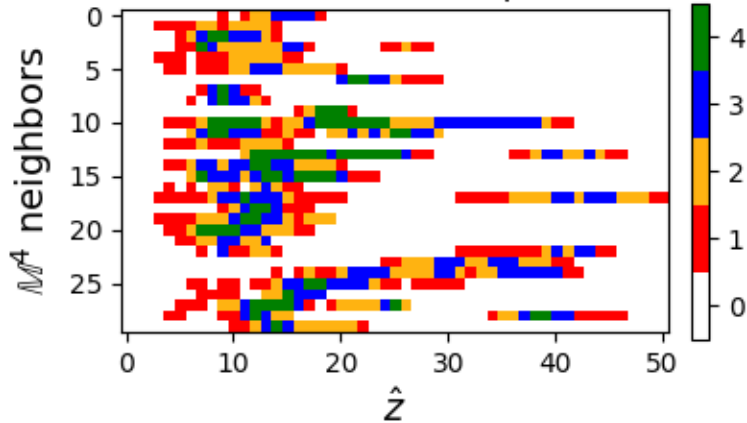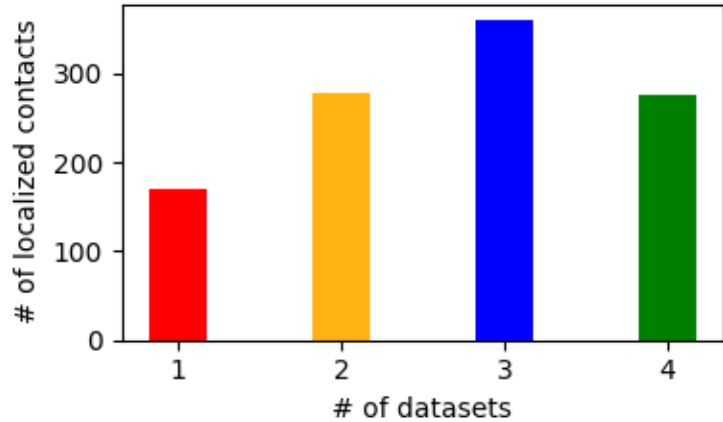

Localization of SAADL process

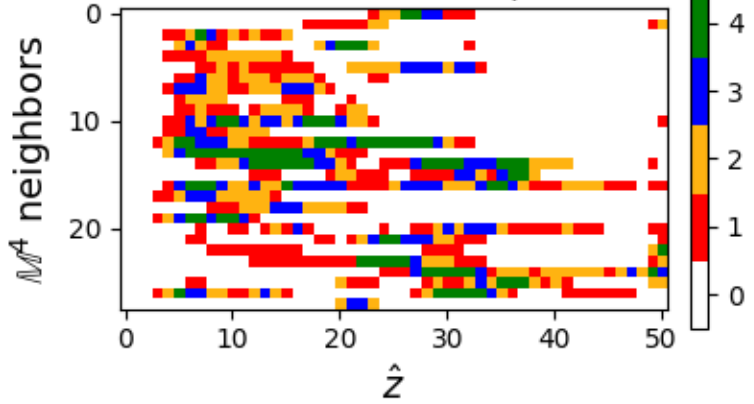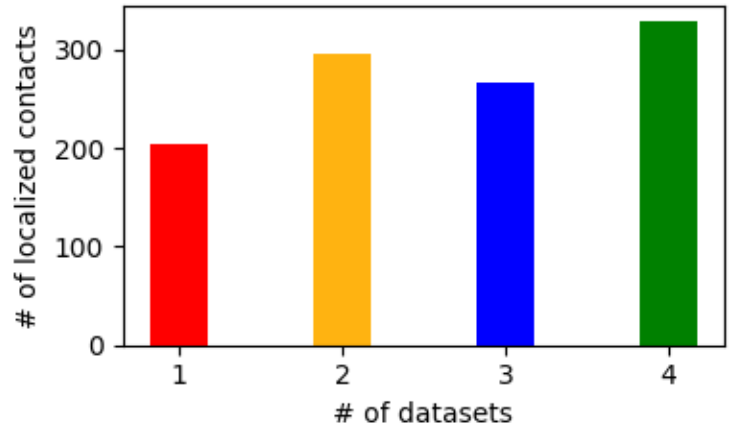



Localization of SAAVL process

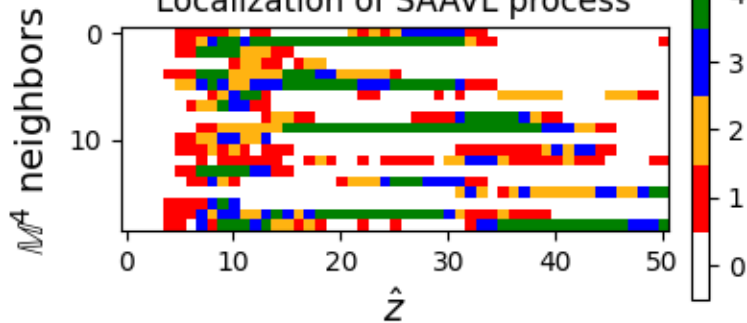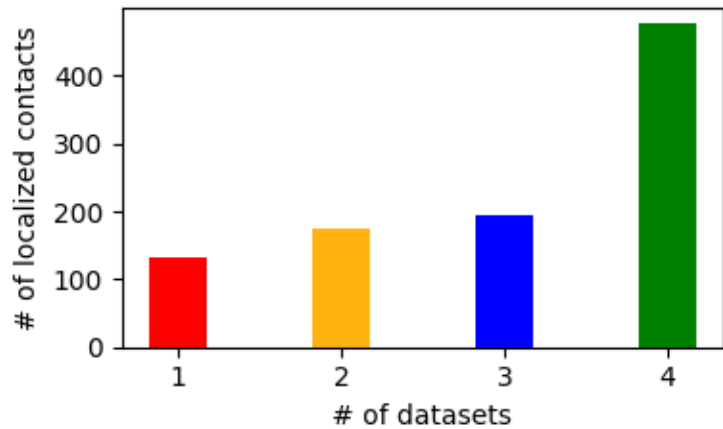

$\mathcal{M}^A$  neighbors

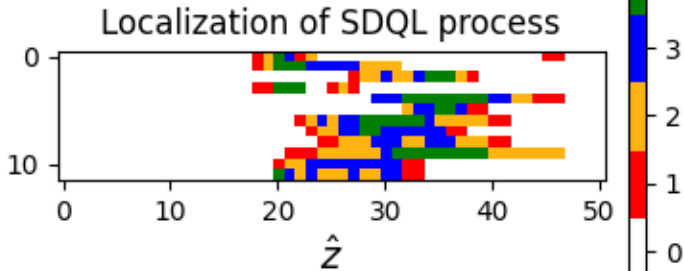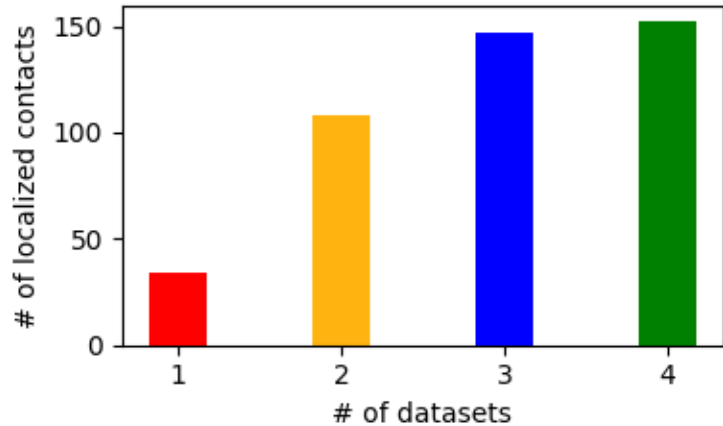

Localization of SIADL process

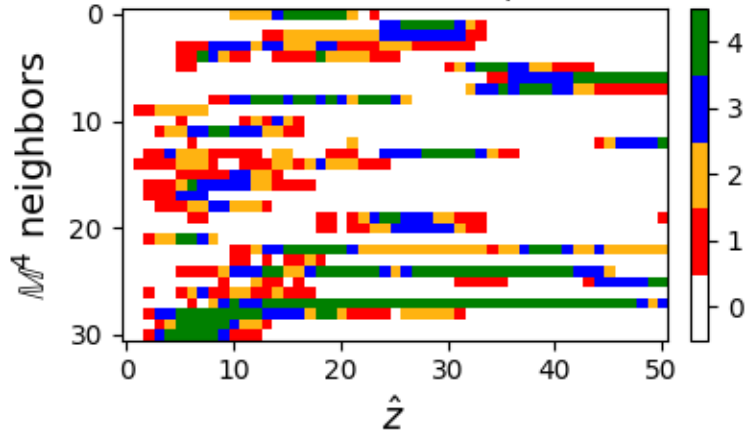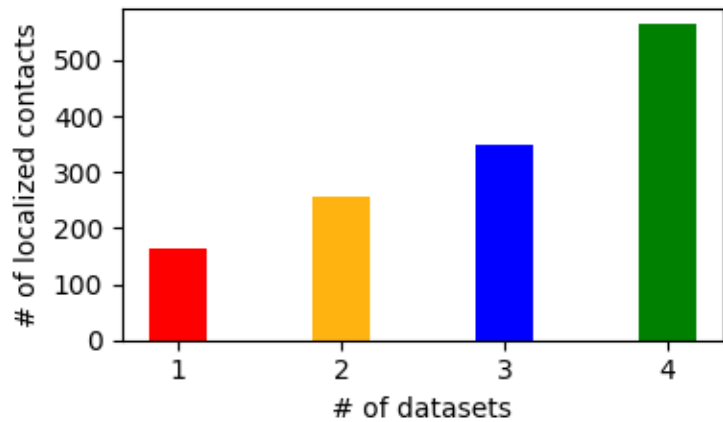

Localization of SIAVL process

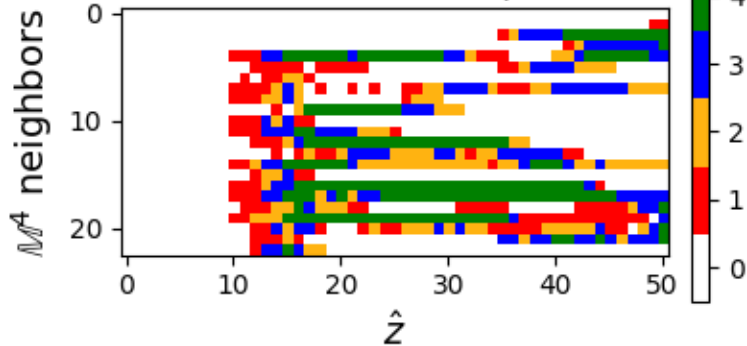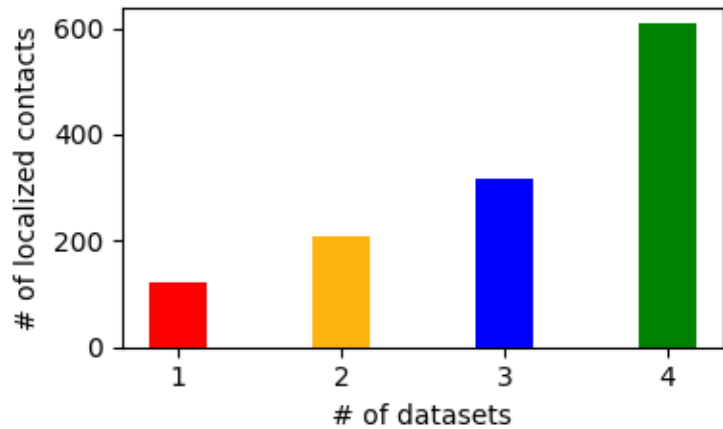

Localization of SIBDL process

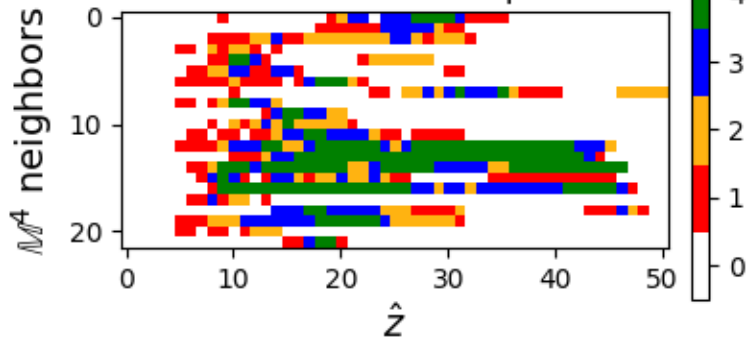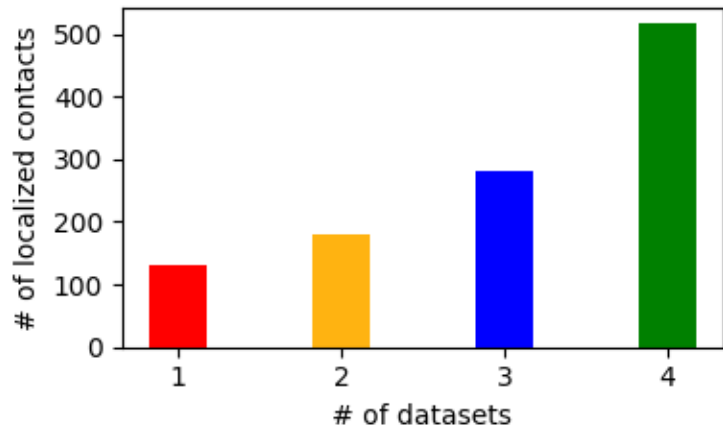

Localization of SIBVL process

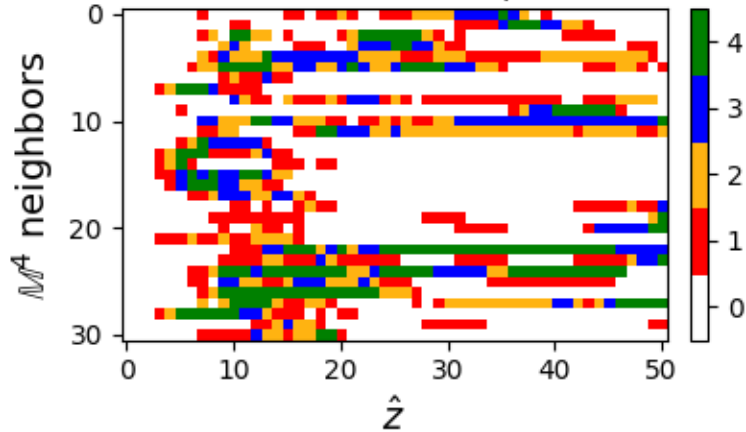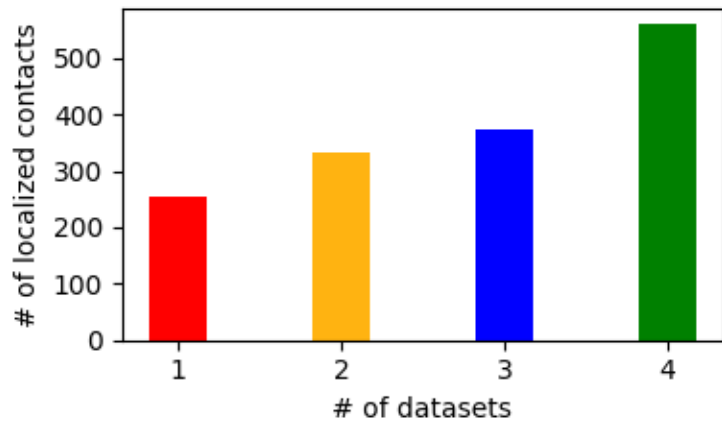

Localization of SMBDL process

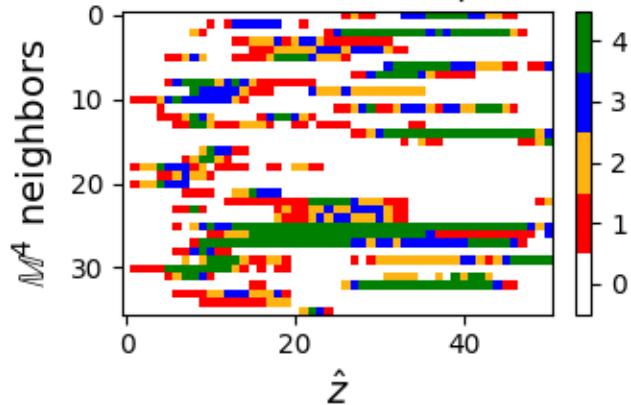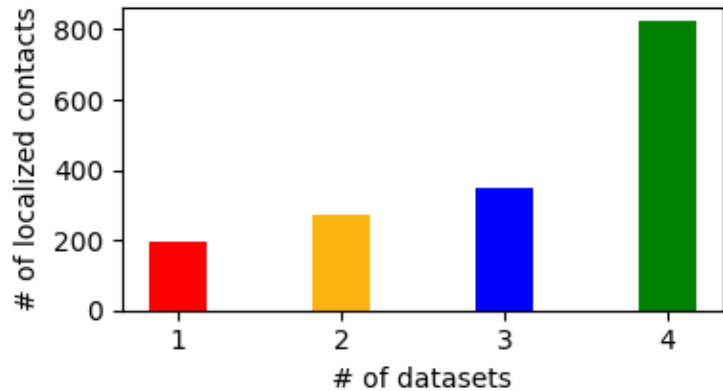

Localization of SMBVL process

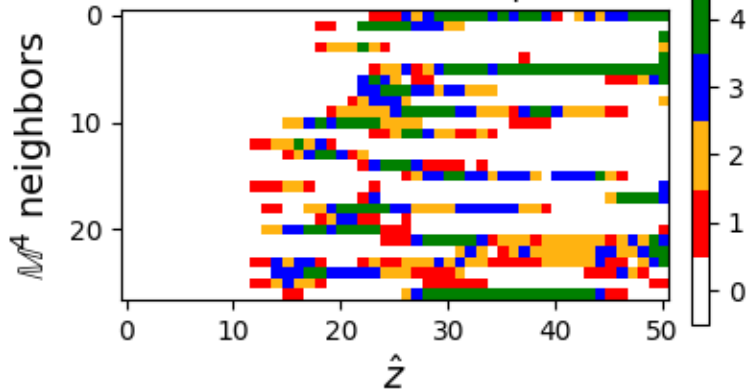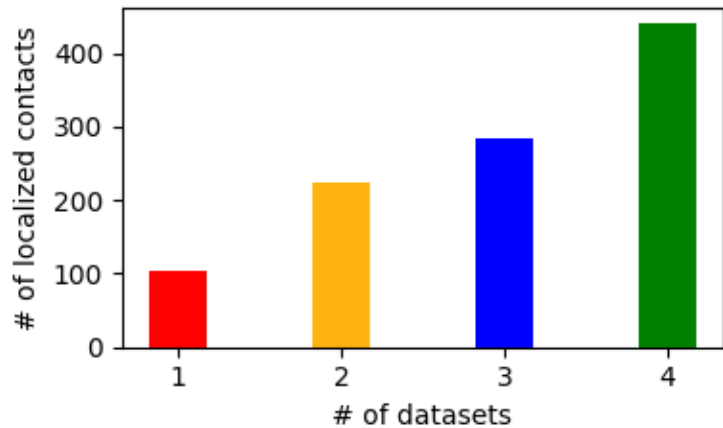



Localization of SMDDL process

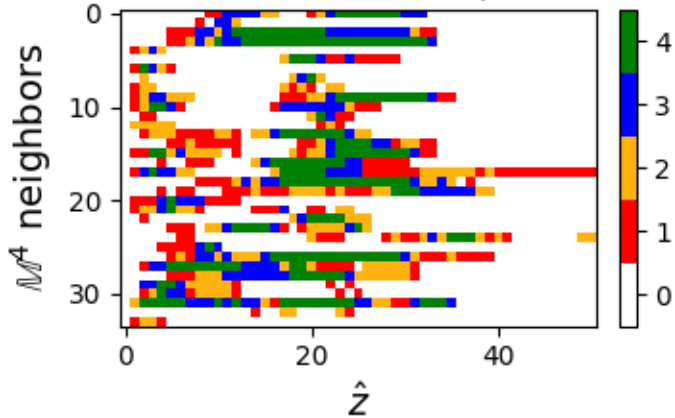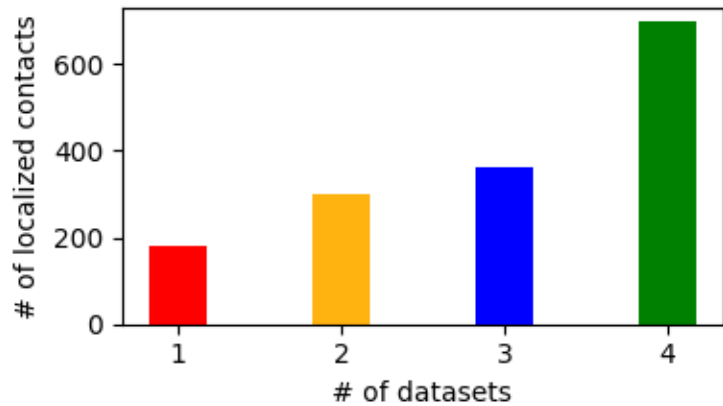

Localization of SMDVL process

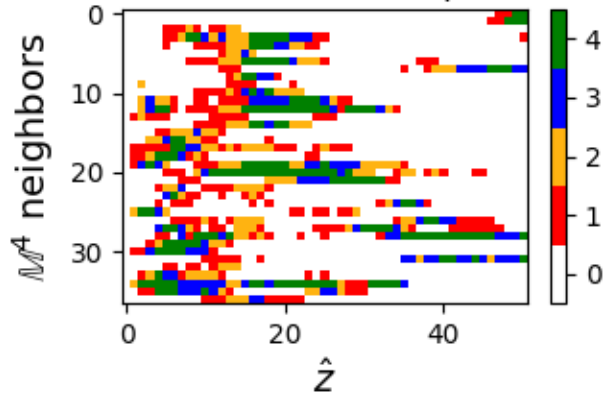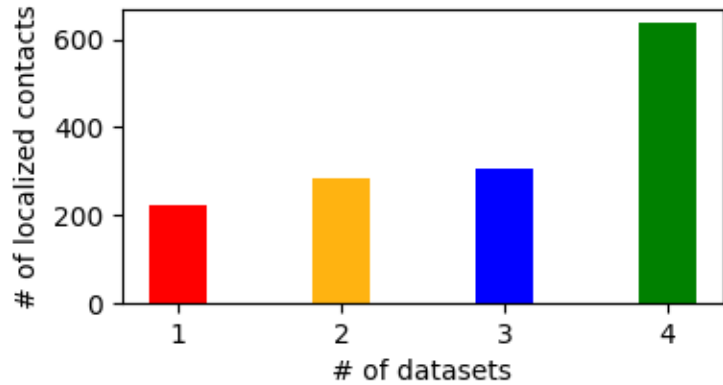

$M^A$  neighbors

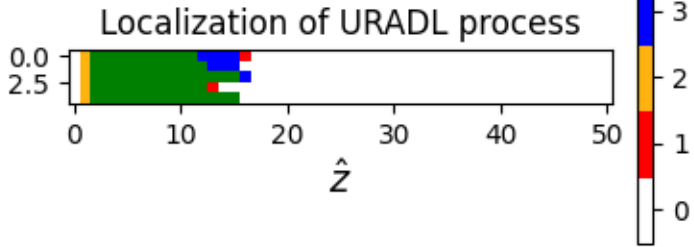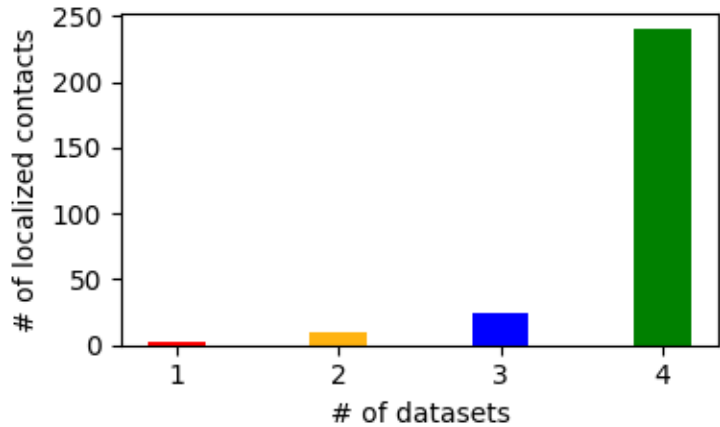

$\mathcal{M}^A$  neighbors

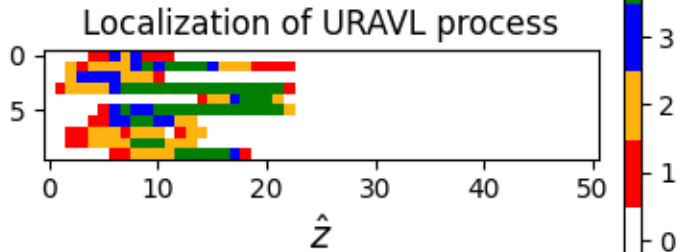

# of localized contacts

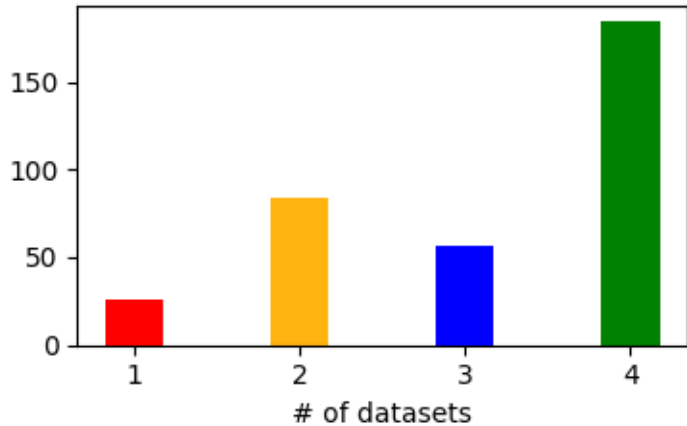

$M^A$  neighbors

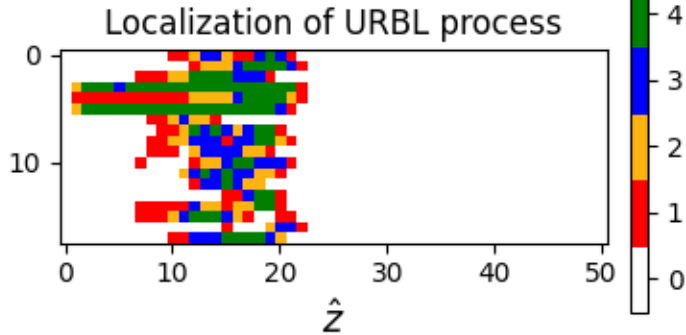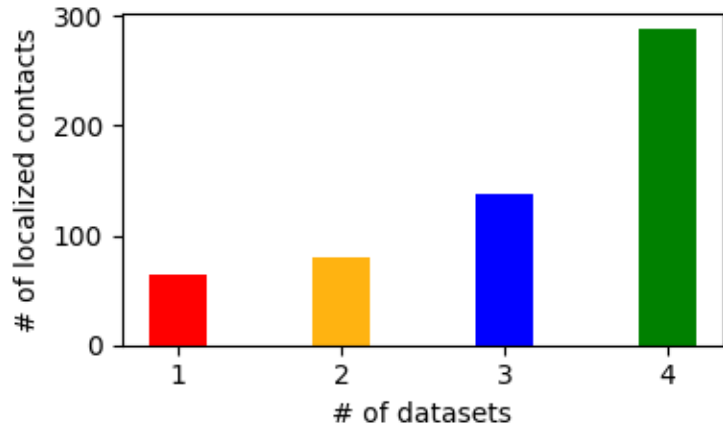

Localization of URXL process

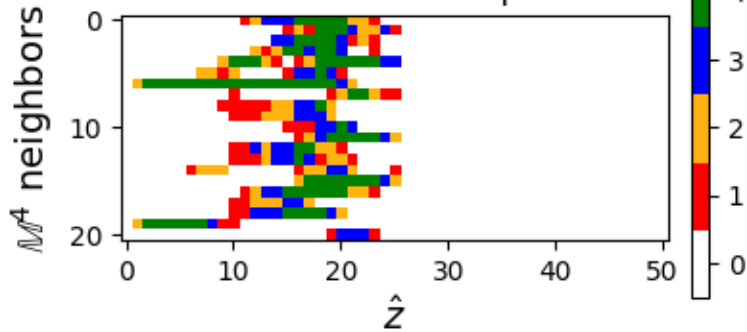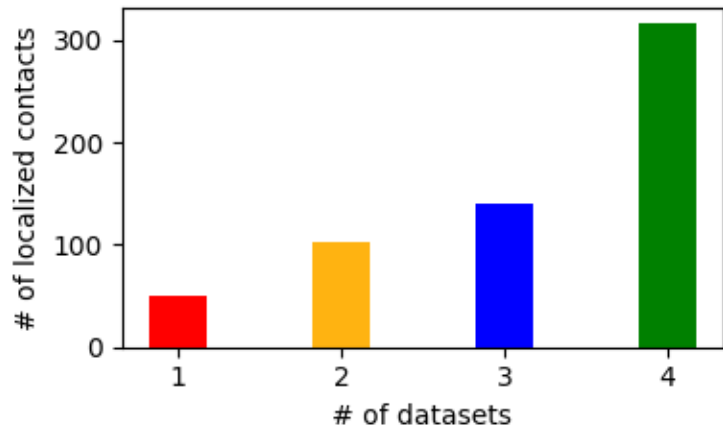

$\mathcal{M}^A$  neighbors

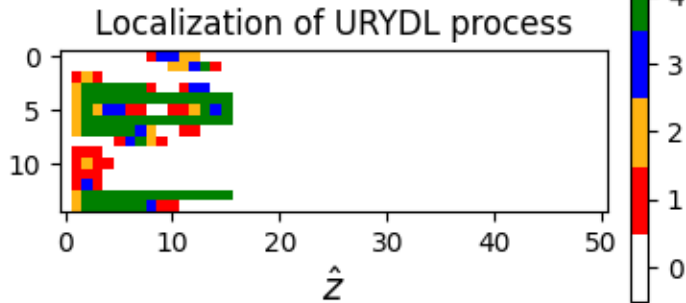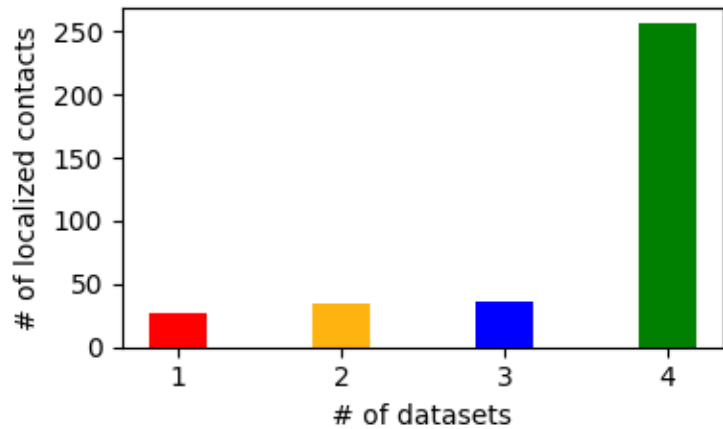

Localization of URYVL process

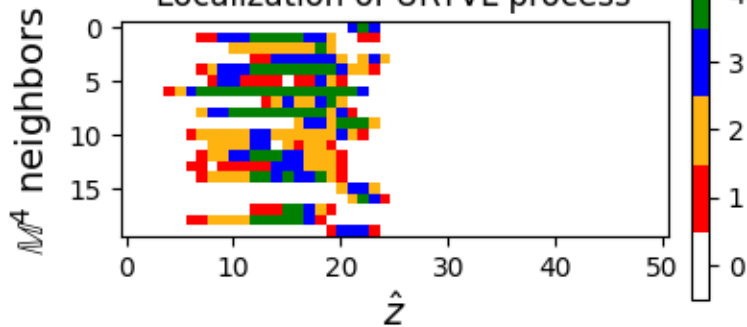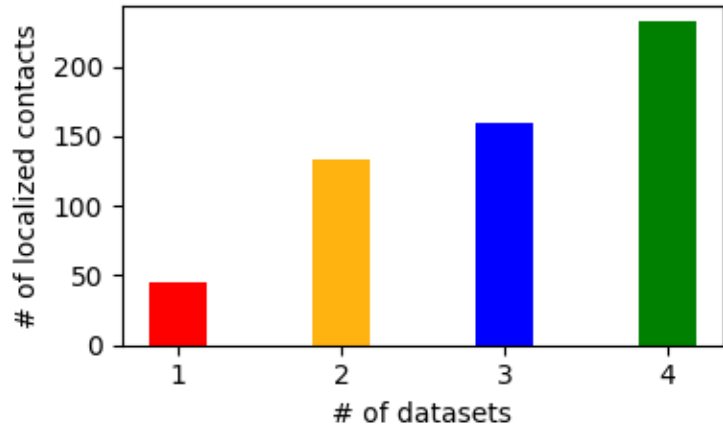

Supplement: NIHMS2028296-supplement-Supp_Info_2.pdf [file NIHMS2028296-supplement-Supp_Info_2.pdf]
