# Supplementary material
Source: PubMed Central journal article supplement (PMC11648602)
Supplement: NIHMS2028296-supplement-Supp_Table_1.pdf [file NIHMS2028296-supplement-Supp_Table_1.pdf]

|                            | <b>Adult</b> | <b>L4</b> | <b>Reference</b>                                          |
|----------------------------|--------------|-----------|-----------------------------------------------------------|
| Series name                | N2U          | JSH       | $\mathbb{M}^\delta, \mathbb{C}^\delta, \mathbb{G}^\delta$ |
| # EMs                      | 302          | 410       | –                                                         |
| Volume ( $\mu\text{m}^3$ ) | 4051         | 3533      | –                                                         |
| # Neurons                  | 185          | 181       | 173                                                       |
| # Membrane contacts        | 5368         | 4861      | 2955                                                      |
| # Synaptic contacts        | 2349         | 1583      | 1474                                                      |
| # Chemical synapses        | 4173         | 2666      | –                                                         |
| # Gap junction contacts    | 490          | 404       | 389                                                       |
| # Gap junctions            | 730          | 702       | –                                                         |

**Supplementary Table 1.** Summary of volumetric reconstruction and extracted reference datasets. A contact, akin to an edge on a graph, is defined by the existence of at least one connection (membrane adjacency, chemical synapse or gap junction) between two neurons. Adult and L4 data refer to complete datasets (prior to any preprocessing in this study). NB: Volume estimated from the sum of the cross-sectional areas of the segmented neurons. Reference column shows restricted datasets following pre-processing (see Methods), including  $\mathbb{M}^1$ - $\mathbb{M}^4$  for membrane adjacency, but only  $\mathbb{M}^4$  for synaptic and gap junction reference datasets (see, e.g. Figs. 2 and 4).
