# Supplementary material
Source: PubMed Central journal article supplement (PMC11648602)
Supplement: NIHMS2028296-supplement-Supp_Table_2.pdf [file NIHMS2028296-supplement-Supp_Table_2.pdf]

| Adjacency classification errors |         |                      |                |                 |                |                 |             |             |
|---------------------------------|---------|----------------------|----------------|-----------------|----------------|-----------------|-------------|-------------|
| Series                          | # cells | Possible adjacencies | True positives | False positives | True negatives | False negatives | Sensitivity | Specificity |
| JSH001                          | 111     | 1176                 | 111            | 0               | 1061           | 4               | 0.965       | 1.00        |
| JSH040                          | 296     | 3240                 | 296            | 1               | 2936           | 7               | 0.977       | 1.00        |
| Total                           | –       | 4416                 | 407            | 1               | 3997           | 11              | 0.974       | 1.00        |

**Supplementary Table 2.** We compared the results of the adjacency classification algorithm to manually scored EM sections (ground truth). Two sections in the L4 data set were manually scored (JSH001 and JSH040). A section with  $n$  cells has  $n(n - 1)/2$  possible cell pairings that can be classified as either adjacent or non-adjacent. Sensitivity measures how likely two adjacent cell are classified as adjacent. Specificity measures how likely two non-adjacent cells are classified as not adjacent. See Methods and Supplementary Information 5 for details on how sensitivity and specificity were calculated.
